# Supplementary material for: The collateral activity of RfxCas13d can induce lethality in a RfxCas13d knock-in mouse model
Source: PubMed Central journal article supplement (PMC9893547; doi:10.1186/s13059-023-02860-w), 2023-02-01
Supplement: 13059_2023_2860_MOESM1_ESM.pdf [file 13059_2023_2860_MOESM1_ESM.pdf]

Fig. S1

a

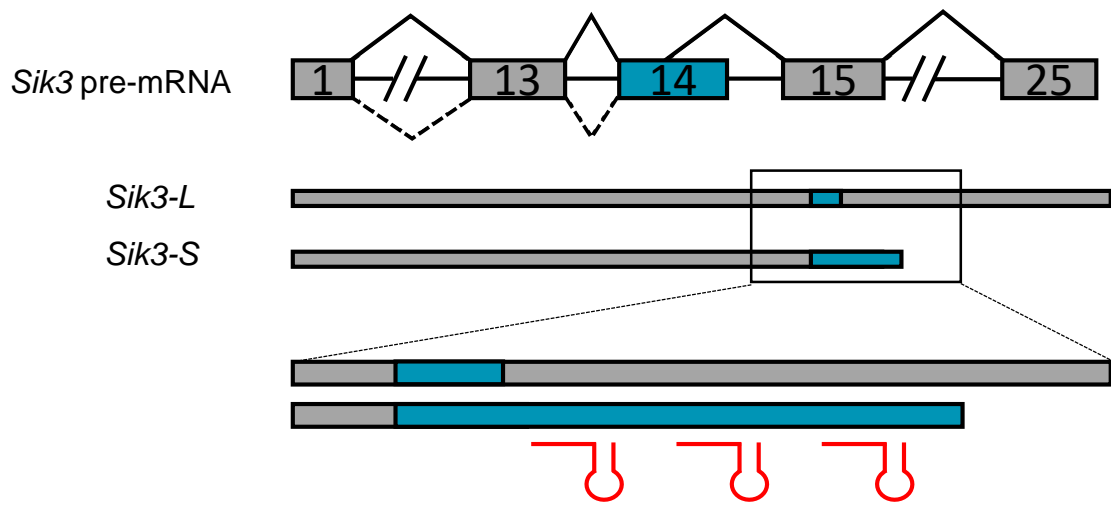

b

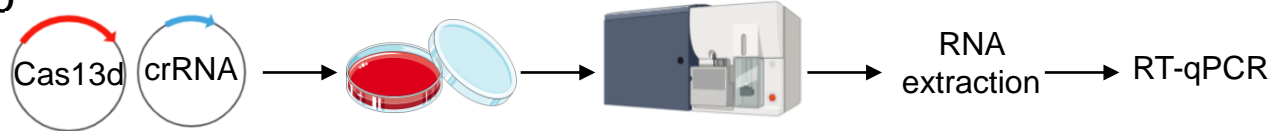

**Fig. S1** Designing crRNAs targeting *Sik3-S* to specifically knock down *Sik3-S* in tandem with RfxCas13d ((Linked to Fig. 1). **a.** Schematic illustration of alternative splicing process to generate *Sik3-L* and *Sik3-S* transcripts, and design of *Sik3-S* crRNAs. **b.** Workflow of measuring the knockdown efficiency of crRNAs in N2a or HEK293T cells.

# Fig. S2

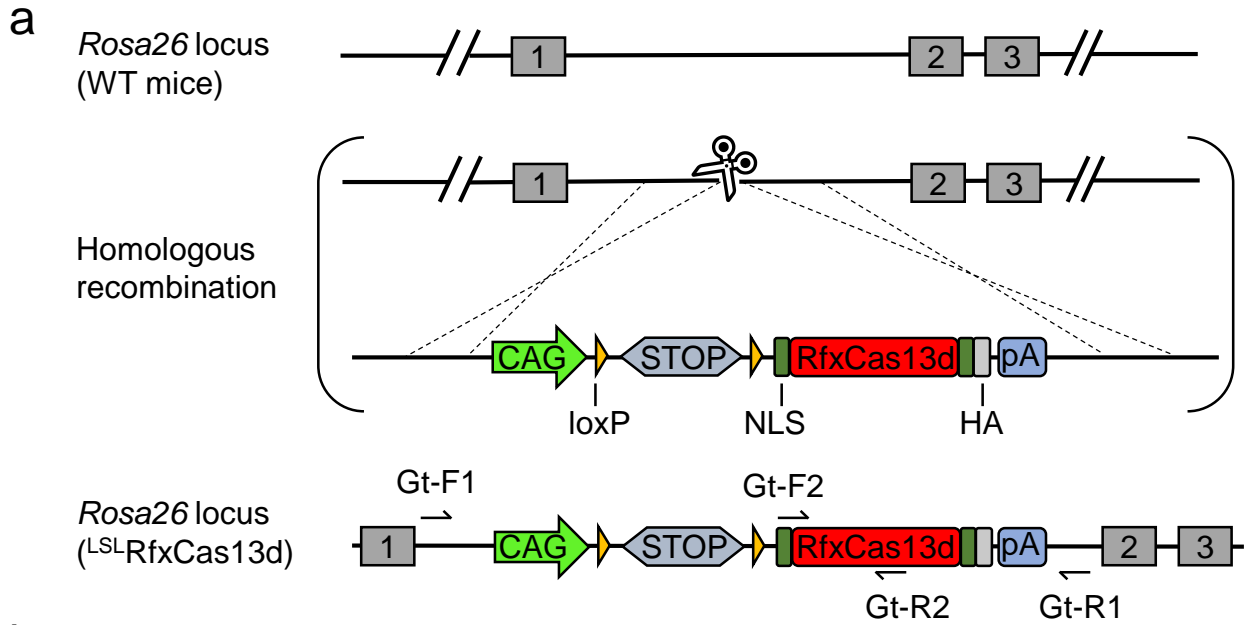

**b**

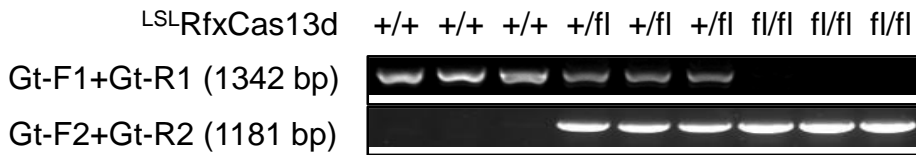

**c**

| Embryos Microinjection Statistics |                 |           |                   |
|-----------------------------------|-----------------|-----------|-------------------|
| Alleles                           | Embryo injected | Pups born | Positive founders |
| <sup>LSL</sup> RfxCas13d          | 224             | 21        | 4 (19.0%)         |
| <sup>LSL</sup> RfxCas13d          | 100             | 13        | 2 (15.4%)         |

**d**

| Statistical analysis of the deviations from Mendelian genetics |             |      |     |          |      |       |                  |    |             |
|----------------------------------------------------------------|-------------|------|-----|----------|------|-------|------------------|----|-------------|
| <sup>LSL</sup> RfxCas13d                                       | Observation |      |     | Expected |      |       | Chi-square value | df | P value     |
|                                                                | fl/fl       | +/fl | +/+ | fl/fl    | +/fl | +/+   |                  |    |             |
| Male                                                           | 11          | 19   | 12  | 10.5     | 21   | 10.5  | 0.428571429      | 2  | 0.807117747 |
| Female                                                         | 13          | 24   | 16  | 13.25    | 26.5 | 13.25 | 0.811320755      | 2  | 0.6665365   |
| Total                                                          | 24          | 43   | 28  | 23.75    | 47.5 | 23.75 | 1.189473684      | 2  | 0.551707733 |

**Fig. S2** The generation of <sup>LSL</sup>RfxCas13d mice (Linked to Fig. 1). **a.** Schematic illustration of the mechanism of generating <sup>LSL</sup>RfxCas13d mice. NLS: nuclear localization sequence; HA: hemagglutinin tag; CAG: CAG promoter; U6: U6 promoter; STOP: a tripartite transcriptional stop cassette. **b.** Genotyping of <sup>LSL</sup>RfxCas13d<sup>fl/fl</sup>, <sup>LSL</sup>RfxCas13d<sup>+/fl</sup> and WT mice. **c.** Statistical table to show the results of twice embryo microinjections. **d.** Statistical analysis of the deviations from Mendelian genetics for six litters of mice (<sup>LSL</sup>RfxCas13d<sup>+/fl</sup> x <sup>LSL</sup>RfxCas13d<sup>+/fl</sup>). df: degree of freedom.

Fig. S3

a

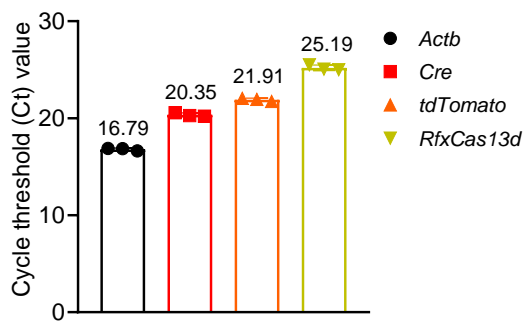

b

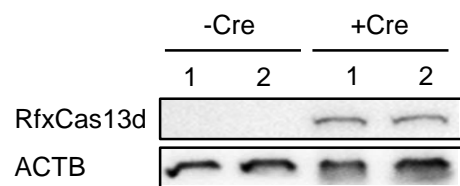

c

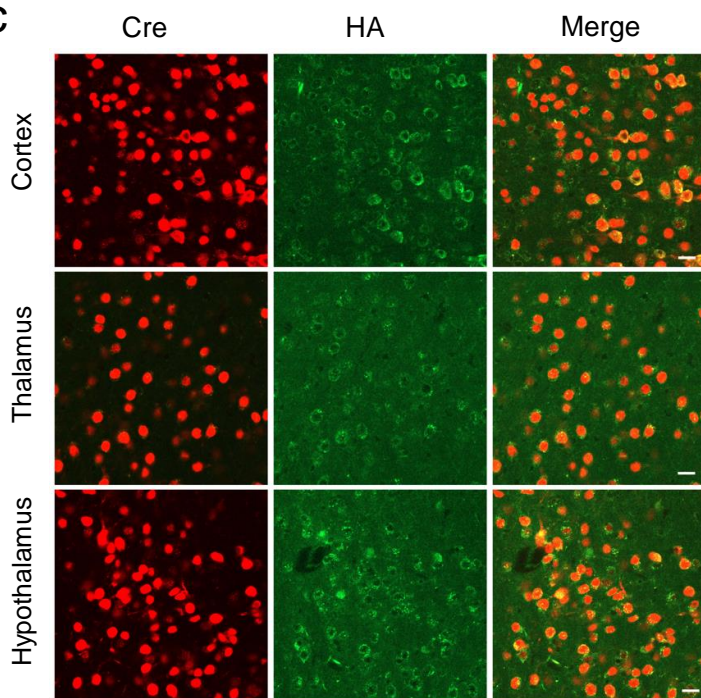

d

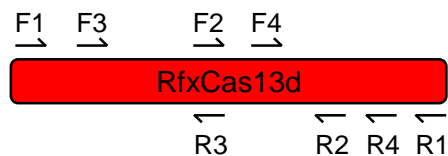

e

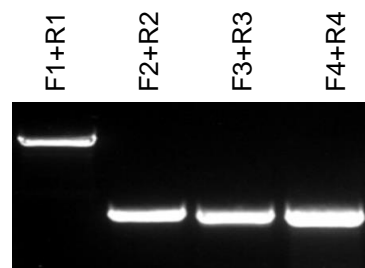

**Fig. S3** The expression of RfxCas13d can be released by hSYN-driven Cre in mouse brain (Linked to Fig. 1). **a.** RT-qPCR to measure the RNA level of *Actb*, *Cre*, *tdTomato* and *RfxCas13d* in the brain tissue from <sup>LSL</sup>RfxCas13d<sup>+/fl</sup>Ai14<sup>+/fl</sup> mice two weeks after injection of AAV-PHP.eB carrying hSYN-driven Cre (n=3). The numbers above the histogram represent the average. **b.** Western blot to measure the protein level of RfxCas13d in the brain tissue from <sup>LSL</sup>RfxCas13d<sup>+/fl</sup>Ai14<sup>+/fl</sup> mice two weeks after injection of AAV-PHP.eB carrying hSYN-driven Cre. **c.** Representative images showing coimmunostaining of Cre (1:1000, 15036T, CST) and RfxCas13d-HA (1:500, 11867423001, Roche) in the cortex, thalamus and hypothalamus (sagittal section) of <sup>LSL</sup>RfxCas13d<sup>fl/fl</sup> mice two weeks after injection of AAV-PHP.eB carrying hSYN-driven Cre (Flag tag). Scale bar: 20 μm. **d.** Schematic illustration of the design of primers for identifying the transcript variants of RfxCas13d in the brain tissue <sup>LSL</sup>RfxCas13d<sup>+/fl</sup>Ai14<sup>+/fl</sup> mice two weeks after injection of AAV-PHP.eB carrying hSYN-driven Cre. **e.** Gel picture of PCR products using primers in **d**.

Fig. S4

a

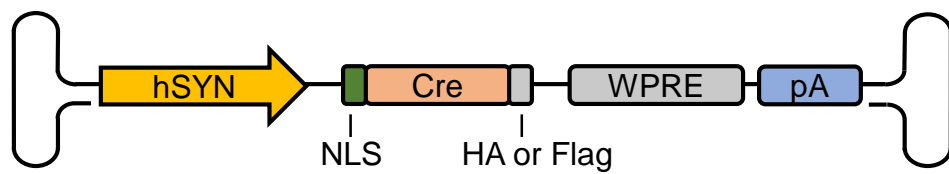

b

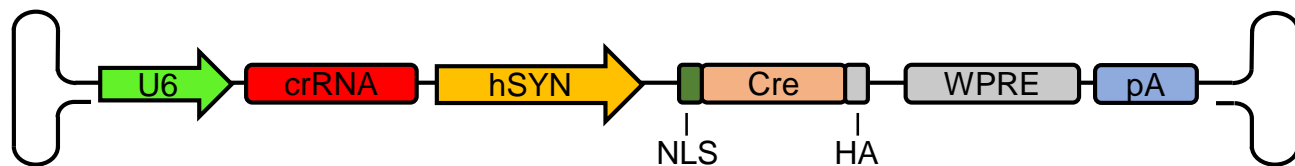

**Fig. S4** Schematic structures of recombinant AAV-PHP.eB vector genomes (Linked to Fig. 1). **a.** Schematic illustration of AAV-PHP.eB plasmid used to deliver hSYN-driven Cre. Tag: HA/Flag. **b.** Schematic illustration of AAV-PHP.eB plasmid used to deliver U6-driven crRNA and hSYN-driven Cre. hSYN: human synapsin 1 gene promoter.



Fig. S5

a

*Sik3-E5<sup>fl/fl</sup>* locus

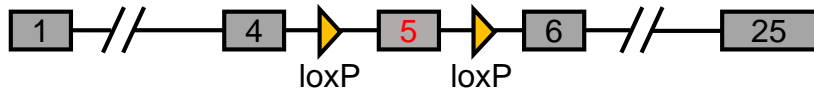

AAV-PHP.eB-hSYN-Cre

*Sik3-E5<sup>Δ</sup>* locus

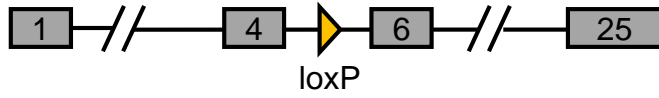

**Fig. S5** Schematic illustration of knocking out *Sik3* via the conventional Cre-loxP system (Linked to Fig. 2). **a.** Schematic illustration of knocking out *Sik3* in *Sik3-E5<sup>fl/fl</sup>* mice by injection of AAV-PHP.eB carrying hSYN-driven Cre.

Fig. S6

a

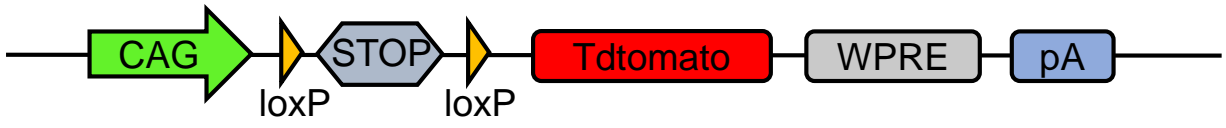

b

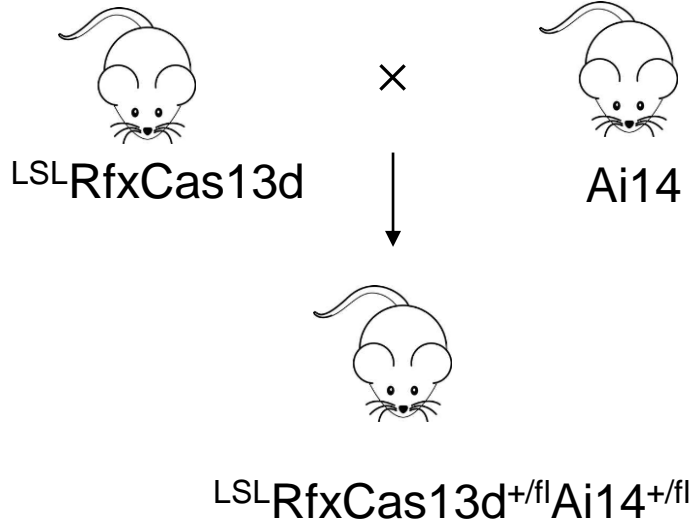

**Fig. S6** The generation of  $^{LSL}Cas13d^{+/fl}Ai14^{+/fl}$  mice (Linked to Fig. 3). **a.** Schematic diagram of Ai14 reporter mice. **b.** Schematic illustration of generating  $^{LSL}RfxCas13d^{+/fl}Ai14^{+/fl}$  mice by crossing  $^{LSL}RfxCas13d^{fl/fl}$  mice with Ai14 mice.

**Fig. S7**

**a**

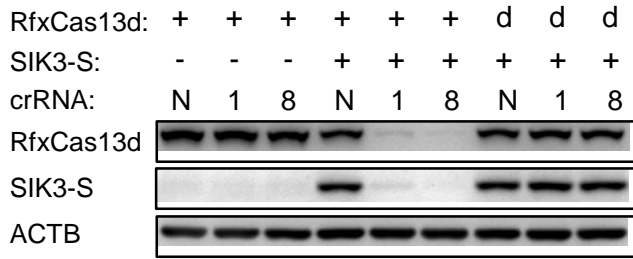

**b**

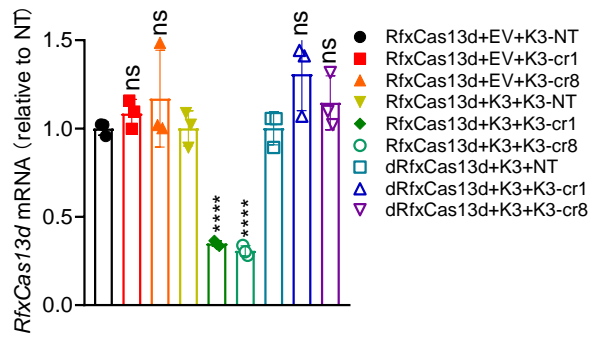

**c**

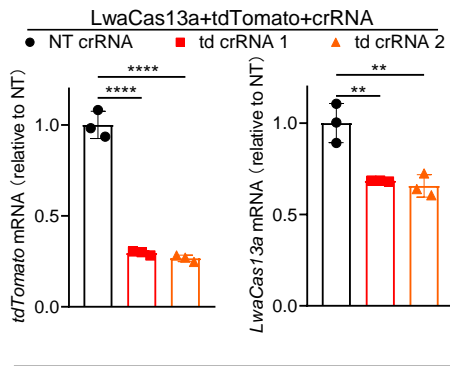

**d**

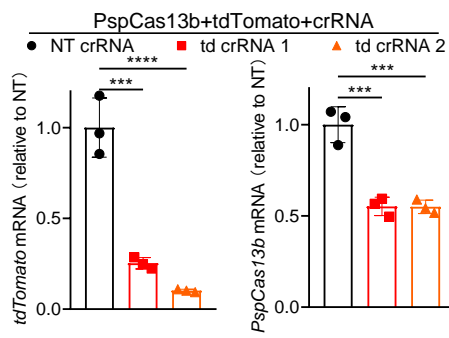

**e**

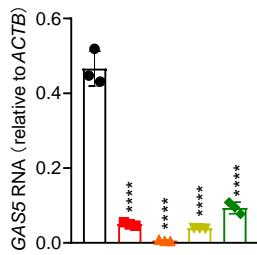

**i**

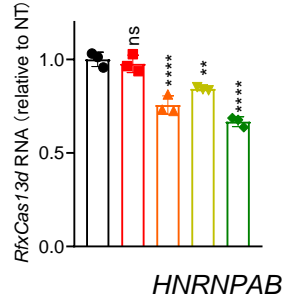

**m**

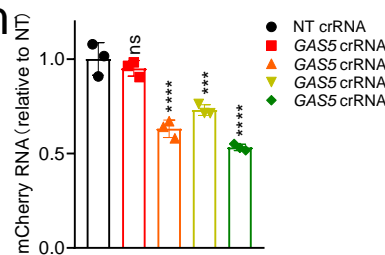

**f**

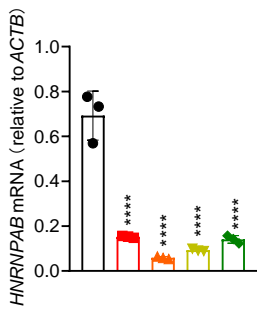

**j**

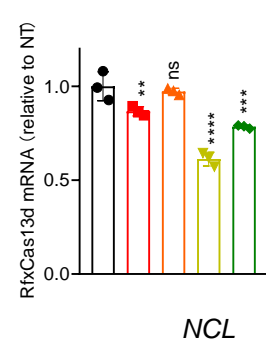

**n**

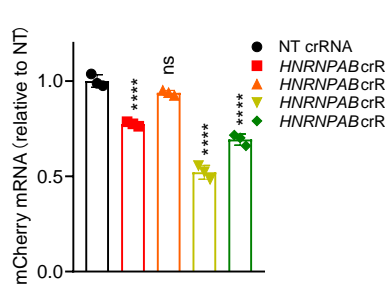

**g**

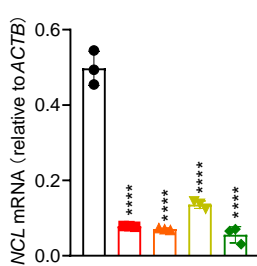

**k**

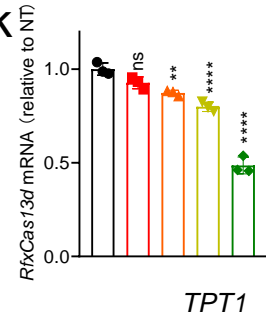

**o**

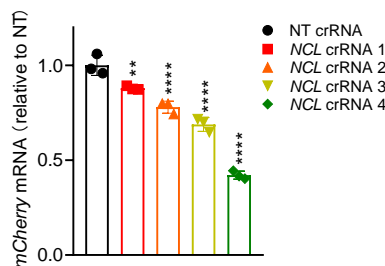

**h**

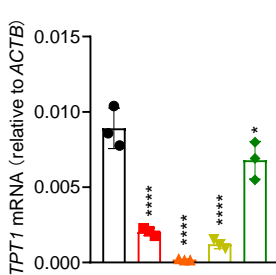

**l**

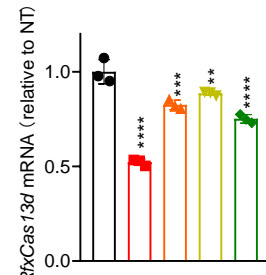

**p**

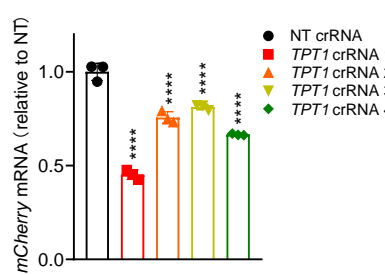

**Fig. S7** The collateral activity of RfxCas13d was positively correlated with the abundance of target RNA in mammalian cells (Linked to Fig. 4). **a.** Western blot to measure the expression level of RfxCas13d and SIK3-S 24 h after transfection of plasmids encoding RfxCas13d, SIK3-S and crRNAs into HEK293T cells. **b.** RT-qPCR to measure the RNA level of RfxCas13d in **a.** K3 represents SIK3-S; EV represents empty vector. **c.** RT-qPCR to measure the RNA level of LwaCas13a and tdTomato in HEK293T cells 24 h after transfection of plasmids encoding LwaCas13a, tdTomato and crRNAs (n=3). td crRNA 1/2: tdTomato crRNA 1/2. **d.** RT-qPCR to measure the RNA level of PspCas13b and tdTomato in HEK293T cells 24 h after transfection of plasmids encoding LwaCas13a, tdTomato and crRNAs (n=3). td crRNA 1/2: tdTomato crRNA 1/2. **e-h.** RT-qPCR to measure the knockdown efficiency of GAS5, HNRNPAB, NCL and TPT1 crRNAs in HEK293T cells. **i-p.** RT-qPCR to measure the mRNA levels of RfxCas13d (**i-l**) and mCherry (**m-p**) in the HEK293T cells 24 h after transfection of plasmids respectively encoding RfxCas13d, mCherry and crRNA. **b-p,** One-way ANOVA with Dunn's multiple comparisons test. Significance levels are noted as \*P < 0.05, \*\*P < 0.01, \*\*\*P < 0.001, \*\*\*\*P < 0.0001 or ns (P > 0.05). All values are presented as mean  $\pm$  SEM.



**Fig. S8** The collateral activity of RfxCas13d caused 28s rRNA breakage (Linked to Fig 5). **a.** Workflow of experiments did in HEK293T-RfxCas13d cells. **b.** Schematic illustration that the collateral activity of RfxCas13d cleaves its own mRNA and 28s RNA, thereby inhibiting its own protein expression. **c.** Quality control of total RNA of WT HEK293T cells transfected with plasmids encoding RfxCas13d and indicated crRNAs by Agilent 2200 Bioanalyzer. cr: crRNA. **d.** Schematic illustration of oligonucleotide extension assay. Red represents oligonucleotide adaptor 1; Yellow represents oligonucleotide adaptor 2. **e.** Gel picture of PCR products from d. **f.** Sanger sequencing results. Ref: reference sequence. The numbers in brackets represent the number of identical sequencing results. **g.** Schematic illustration of reconstituting the collateral activity of RfxCas13d *in vitro*. **h.** Statistical diagram of fluorescence intensity in g. **i.** Quality control of total RNA by Agilent 2200 Bioanalyzer. **h,** Two-tail unpaired t test. Significance levels are noted as \*\*\*P < 0.001 or ns (P > 0.05). All values are presented as mean ± SEM.



**Fig. S9**

**a**

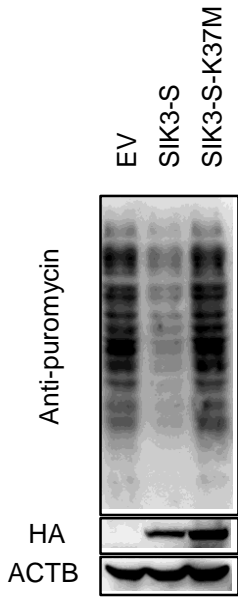

**b**

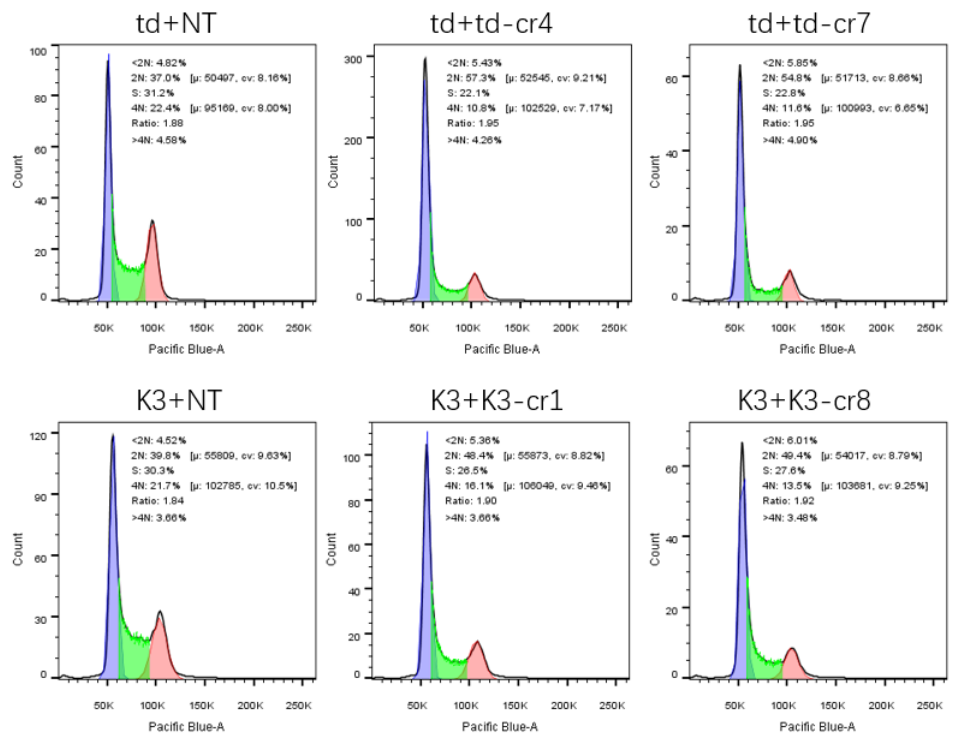

**c**

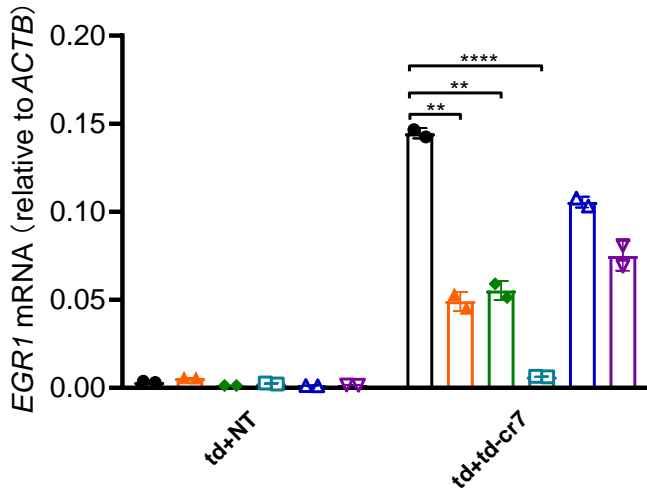

**d**

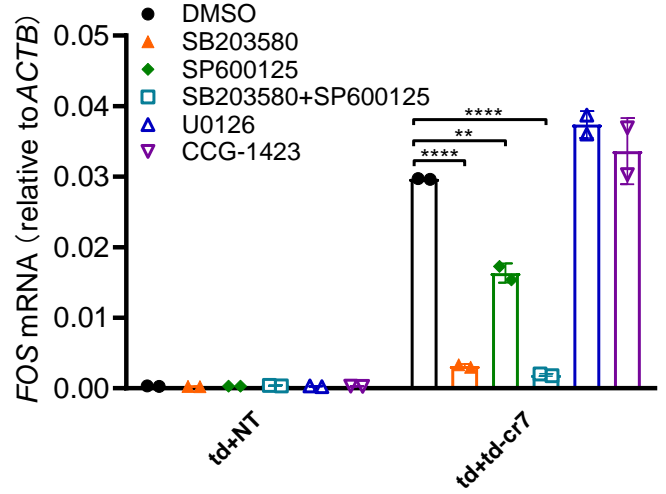

**e**

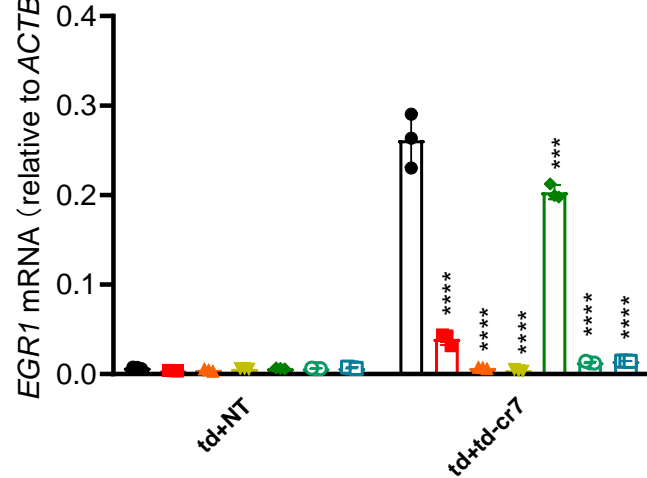

**f**

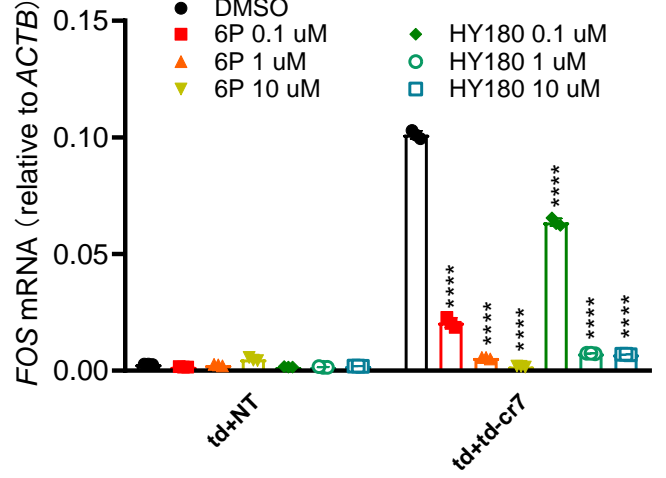

**Fig S9.** The collateral activity of RfxCas13d caused translation attenuation, cell cycle arrest and activation of ZAK $\alpha$ -JNK/p38-IEG pathway (Linked to Fig. 5). **a.** SUnSET assay to measure the protein translation rate of HEK293T-RfxCas13d cells 24 h after transfection of plasmids encoding SIK3-S or SIK3-S-K37M. **b.** Cell cycle analysis using FCAS. **c-d.** RT-qPCR to measure the RNA level of EGR1 and FOS in HEK293T-RfxCas13d cells 24 h after transfection of plasmids encoding tdTomato and crRNAs. Inhibitors and transfection mix were added together. SB203580: p38 inhibitor; SP600125: JNK inhibitor; U0126: MEK1/2 inhibitor; CCG-1423: RhoA/C inhibitor. **e-f.** RT-qPCR to measure the RNA level of EGR1 and FOS in HEK293T-RfxCas13d cells 24 h after transfection of plasmids encoding tdTomato and crRNAs into. ZAK inhibitors and transfection mix were added together. 6p and HY180: ZAK inhibitors. **c-d,** Two-tail unpaired t test. **e-f,** One-way ANOVA with Dunn's multiple comparisons test. Significance levels are noted as \*\*P < 0.01, \*\*\*P < 0.001, \*\*\*\*P < 0.0001 or ns (P > 0.05). All values are presented as mean  $\pm$  SEM.

Fig. S10

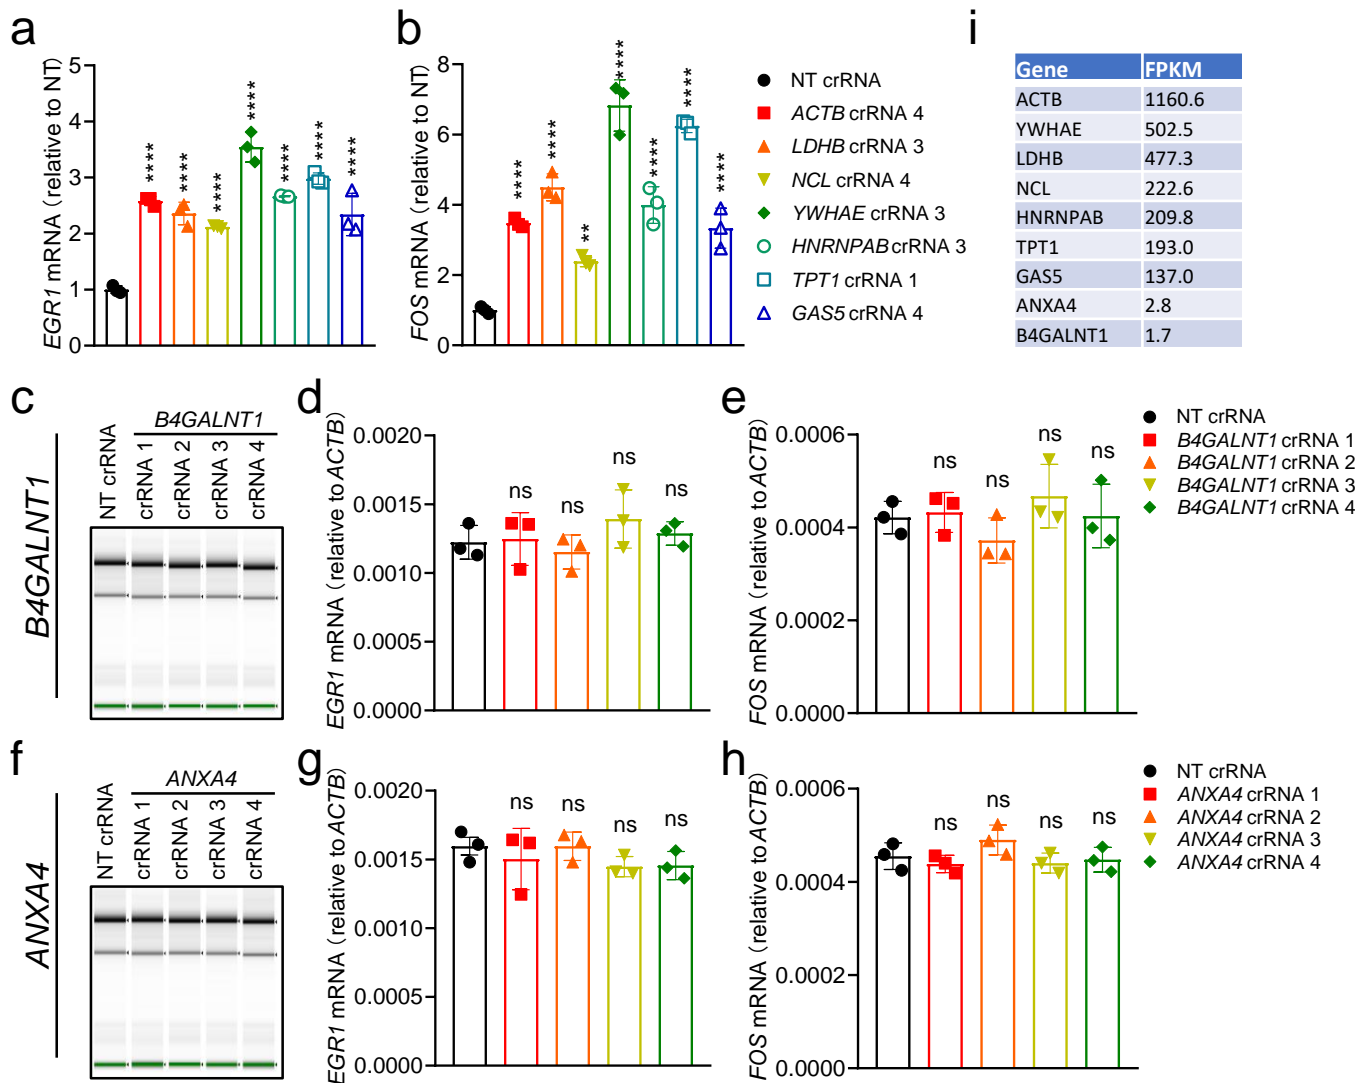

**Fig. S10** RfxCas13d exhibited collateral activity upon targeting highly-expressed endogenous genes (Linked to Fig. 5). **a-b.** RT-qPCR to measure the RNA level of EGR1 (**a**) and FOS (**b**) in WT HEK293T cells 24 h after transfection of plasmids encoding RfxCas13d and NT crRNA (n=3) or indicated crRNAs (n=3). **c-e.** WT HEK293T cells were collected for total RNA integrity analysis and RT-qPCR 24 h after transfection of plasmids encoding RfxCas13d and NT crRNA (n=3) or B4GALNT1 crRNAs (n=3). **c.** Quality control of total RNA of each sample was quantified by Agilent 2200 Bioanalyzer. **d-e.** RT-qPCR to measure the RNA level of EGR1 (**a**) and FOS (**b**) in each sample. **f-h.** WT HEK293T cells were collected for total RNA integrity analysis and RT-qPCR 24 h after transfection of plasmids encoding RfxCas13d and NT crRNA (n=3) or ANXA4 crRNAs (n=3). **f.** Quality control of total RNA of each sample was quantified by Agilent 2200 Bioanalyzer. **g-h.** RT-qPCR to measure the RNA level of EGR1 (**a**) and FOS (**b**) in each sample. **i.** The table to show the expression levels (FPKM) of indicated genes in HEK293T cells (data from RNA-seq). **a-b, d-e, g-h,** One-way ANOVA with Dunn's multiple comparisons test. Significance levels are noted as \*\*P < 0.01, \*\*\*\*P < 0.0001 or ns (P > 0.05). All values are presented as mean  $\pm$  SEM.

Fig. S11

Hela\_RfxCas13d+tdTomato+crRNA (● NT crRNA; ■ *tdTomato* crRNA 7)

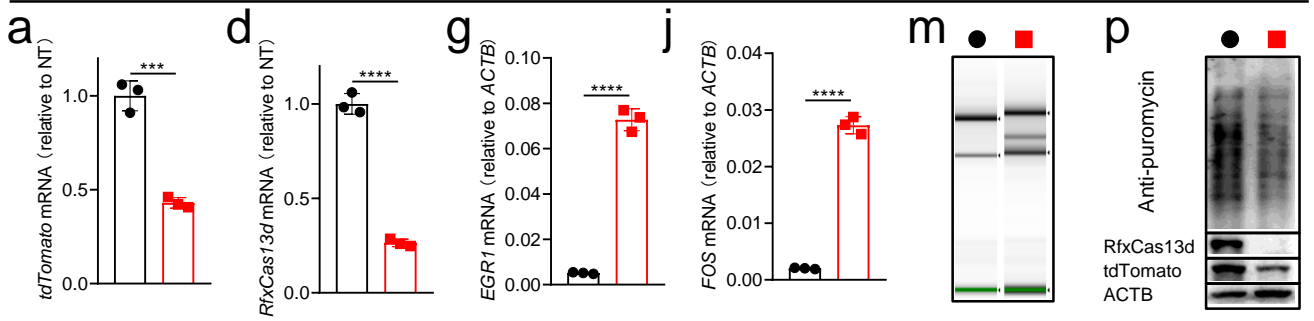

MDA-MB-231\_RfxCas13d+tdTomato+crRNA (● NT crRNA; ■ *tdTomato* crRNA 7)

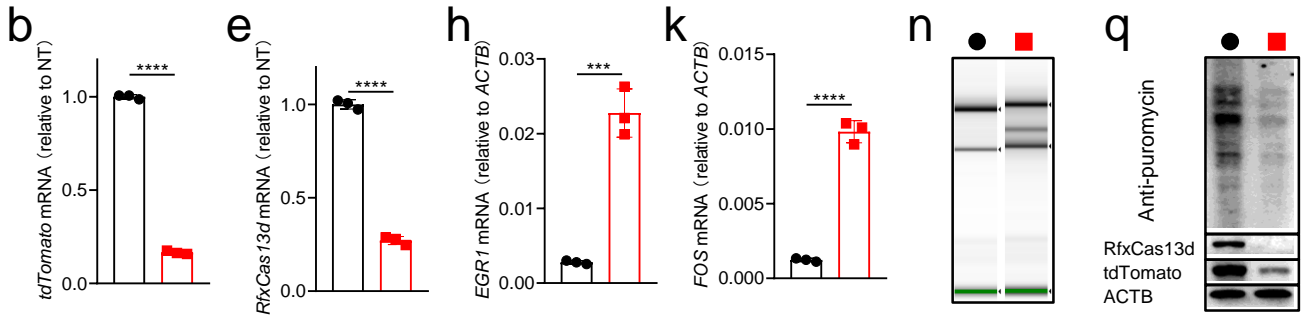

HCT116\_RfxCas13d+tdTomato+crRNA (● NT crRNA; ■ *tdTomato* crRNA 7)

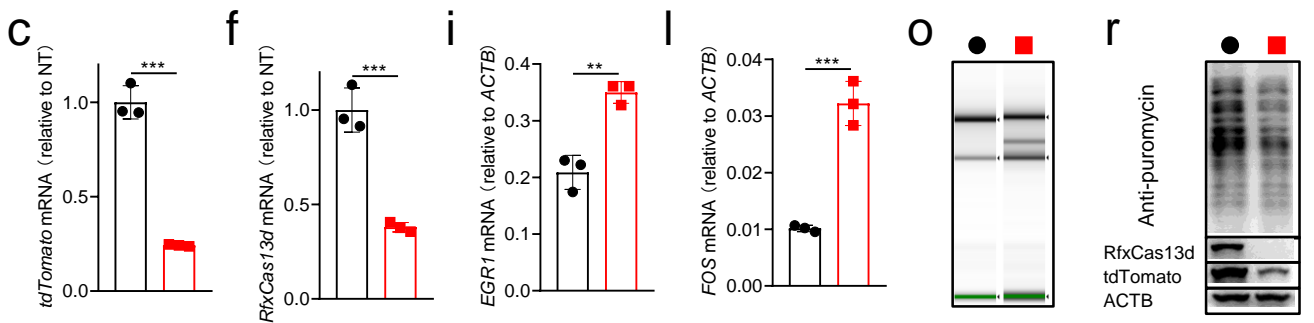

**Fig. S11** RfxCas13d exhibited collateral activity in HeLa, MDA-MB-231 and HCT116 cells (Linked to Fig. 5). RT-qPCR, total RNA integrity analysis and SUnSET were used to measure the expression levels of indicated genes, RNA integrity and protein synthesis respectively in HeLa, MDA-MB-231 and HCT116 cells 24 h after transfection of plasmids encoding RfxCas13d, tdTomato and NT crRNA or tdTomato crRNA 7. **a-l**. RT-qPCR to measure the mRNA levels of tdTomato (**a-c**), RfxCas13d (**d-f**), EGR1 (**g-i**) and FOS (**j-l**). **m-o**. Quality control of total RNA of samples by Agilent 2200 Bioanalyzer. **p-r**. SUnSET assay to measure the protein translation rate. **a-l**, two-tailed unpaired t-test (n=3). Significance levels are noted as \*\*P < 0.01, \*\*\*P < 0.001, \*\*\*\*P < 0.0001 or ns (P > 0.05). All values are presented as mean  $\pm$  SEM.

# Fig. S12

a

| Gene          | N2a     | Brain  |
|---------------|---------|--------|
| <i>ACTB</i>   | 1296.69 | 573.68 |
| <i>Sik3</i>   | 8.84    | 21.39  |
| <i>Map2</i>   | 6.16    | 80.91  |
| <i>Mapt</i>   | 22.76   | 101.10 |
| <i>Rbfox3</i> | 0.03    | 57.27  |

b

| Group | Comparison                                                               | DEGs |
|-------|--------------------------------------------------------------------------|------|
| 1     | dRfxCas13d vs. RfxCas13d                                                 | 6    |
| 2     | dRfxCas13d+NT crRNA vs. RfxCas13d+NT crRNA                               | 194  |
| 3     | dRfxCas13d+ <i>Sik3</i> -S crRNA 1 vs. RfxCas13d+ <i>Sik3</i> -S crRNA 1 | 898  |
| 4     | dRfxCas13d+ <i>Sik3</i> -S crRNA 8 vs. RfxCas13d+ <i>Sik3</i> -S crRNA 8 | 909  |
| 5     | dRfxCas13d+ <i>Map2</i> crRNA 1 vs. RfxCas13d+ <i>Map2</i> crRNA 1       | 1179 |
| 6     | dRfxCas13d+ <i>Map2</i> crRNA 3 vs. RfxCas13d+ <i>Map2</i> crRNA 3       | 447  |
| 7     | dRfxCas13d+ <i>Mapt</i> crRNA 4 vs. RfxCas13d+ <i>Mapt</i> crRNA 4       | 772  |
| 8     | dRfxCas13d+ <i>Mapt</i> crRNA 6 vs. RfxCas13d+ <i>Mapt</i> crRNA 6       | 715  |
| 9     | dRfxCas13d+ <i>Rbfox3</i> crRNA 5 vs. RfxCas13d+ <i>Rbfox3</i> crRNA 5   | 760  |

c

## GO term enrichment analysis

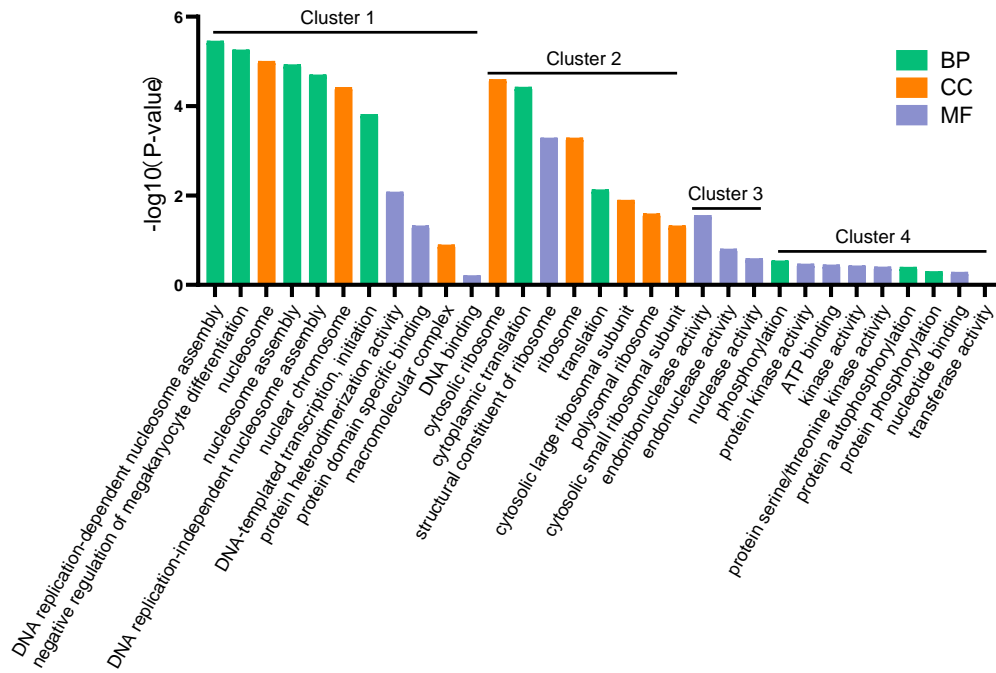

d

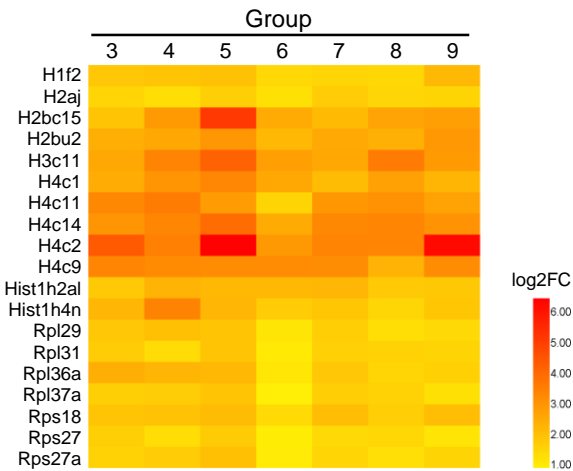

e

| Group | Comparison                                                 | DEGs |
|-------|------------------------------------------------------------|------|
| 10    | dRfxCas13d+NT crRNA vs. dRfxCas13d+ <i>Sik3</i> -S crRNA 1 | 0    |
| 11    | dRfxCas13d+NT crRNA vs. dRfxCas13d+ <i>Sik3</i> -S crRNA 8 | 0    |
| 12    | dRfxCas13d+NT crRNA vs. dRfxCas13d+ <i>Map2</i> crRNA 1    | 0    |
| 13    | dRfxCas13d+NT crRNA vs. dRfxCas13d+ <i>Map2</i> crRNA 3    | 0    |
| 14    | dRfxCas13d+NT crRNA vs. dRfxCas13d+ <i>Mapt</i> crRNA 4    | 0    |
| 15    | dRfxCas13d+NT crRNA vs. dRfxCas13d+ <i>Mapt</i> crRNA 6    | 17   |
| 16    | dRfxCas13d+NT crRNA vs. dRfxCas13d+ <i>Rbfox3</i> crRNA 5  | 3    |

**Fig. S12** RfxCas13d exhibits collateral activity in N2a cells when targeting *Sik3-S*, *Map2*, *Mapt* and *Rbfox3*. **a.** The table to show the expression levels (FPKM) of indicated genes in N2a cells and mouse brain (data from RNA-seq analysis of N2a cells and bulk RNA-seq analysis of brains). **b.** The table to show the RNA-seq samples we did in N2a cells, the group comparisons made, and the number of identified DEGs ( $P_{adj} < 0.05$  and change fold  $\geq 2$ ).  $n=2$ . **c.** GO term enrichment analysis (David online) of 185 common DEGs from seven sets of comparisons (Group 3-9). BP, CC and MF represents biological process, cellular component and molecular function respectively. **d.** Heatmap showing the log<sub>2</sub> fold-change (log<sub>2</sub>FC) values of nucleosome and ribosome-related DEGs from seven sets of comparisons in N2a cells (Group 3-9). **e.** The table to show the group comparisons made, and the number of DEGs.
