# Supplementary material for: The collateral activity of RfxCas13d can induce lethality in a RfxCas13d knock-in mouse model
Source: PubMed Central journal article supplement (PMC9893547; doi:10.1186/s13059-023-02860-w), 2023-02-01
Supplement: 13059_2023_2860_MOESM8_ESM.pdf [file 13059_2023_2860_MOESM8_ESM.pdf]

Fig. S1

IB: SIK3-S

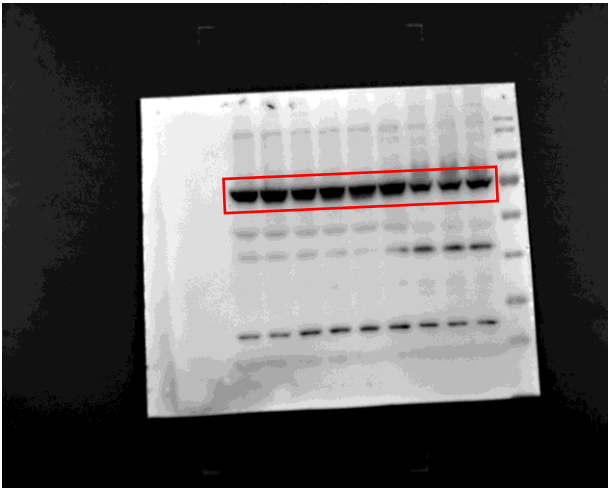

IB: ACTB

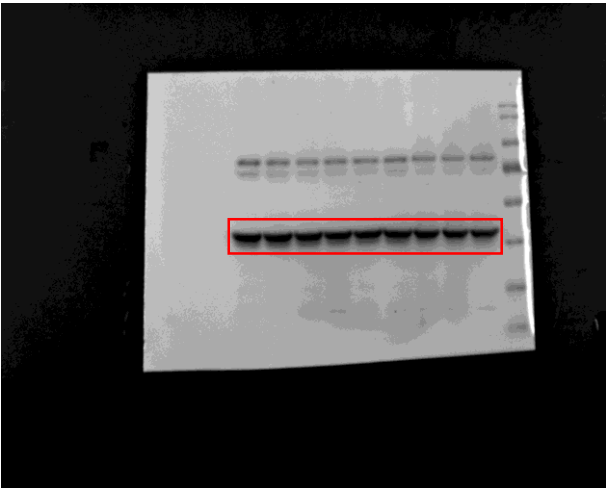

**Fig. S1** Uncropped western blot images for Fig. 1g . Red boxes indicate cropped regions.

Fig. S2

IB: SIK3-S

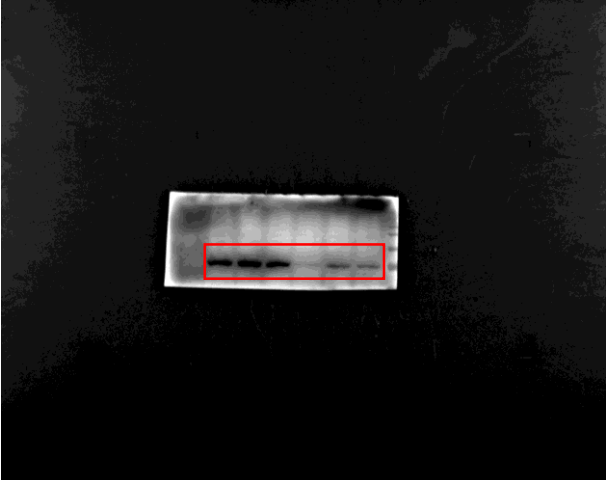

IB: ACTB

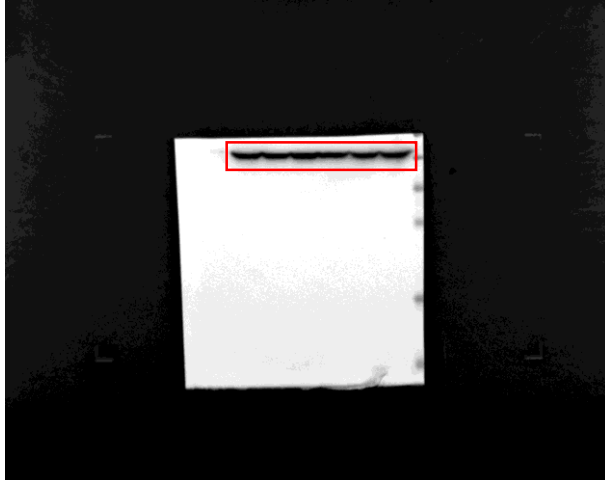

**Fig. S2** Uncropped western blot images for Fig. 2a . Red boxes indicate cropped regions.

Fig. S3

IB: HA (RfxCas13d)

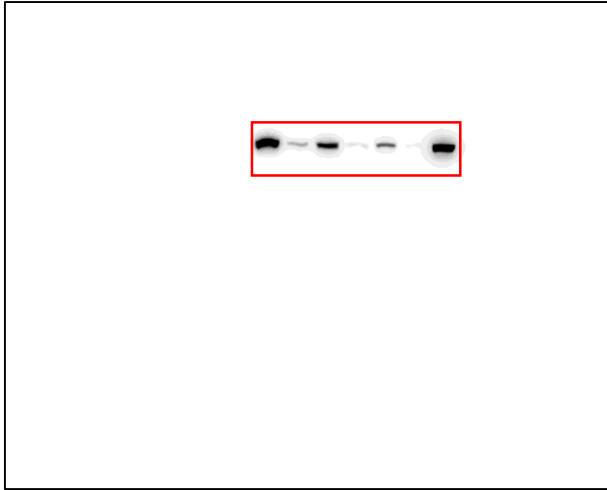

IB: HA (NeuN)

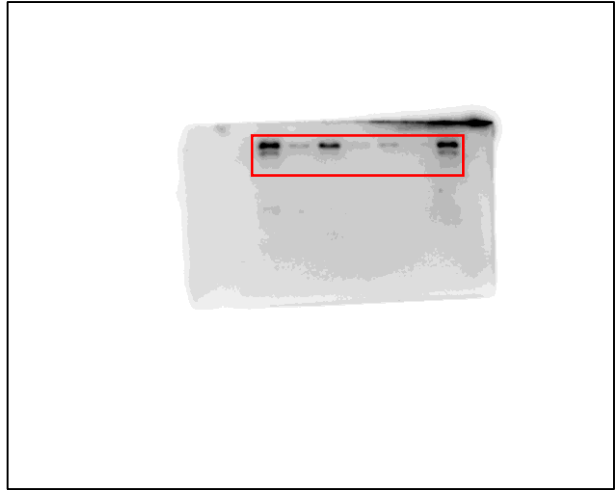

IB: ACTB

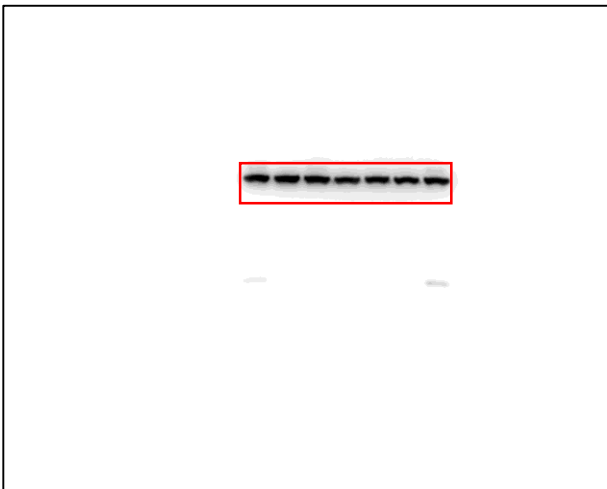

**Fig. S3** Uncropped western blot images for Fig. 2f/Response Fig. 8c (First revision)/ Response Fig. 3a (Second revision). Red boxes indicate cropped regions.

Fig. S4

IB: MAP2

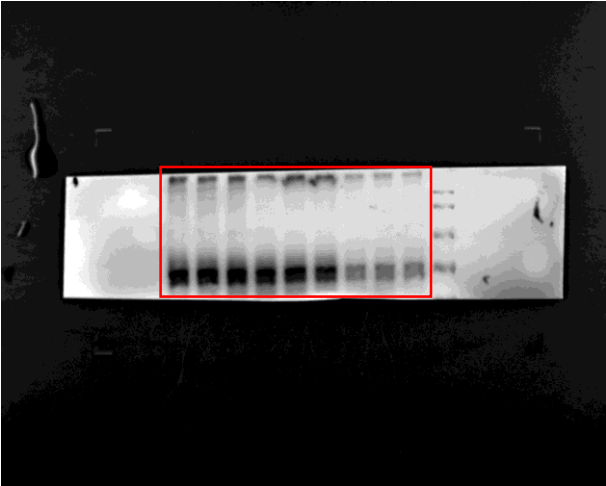

IB: ACTB

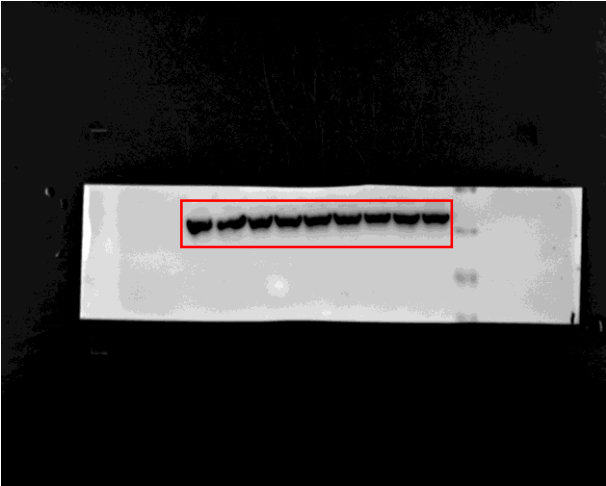

**Fig. S4** Uncropped western blot images for Fig. 2p. Red boxes indicate cropped regions.

Fig. S5

IB: Tau

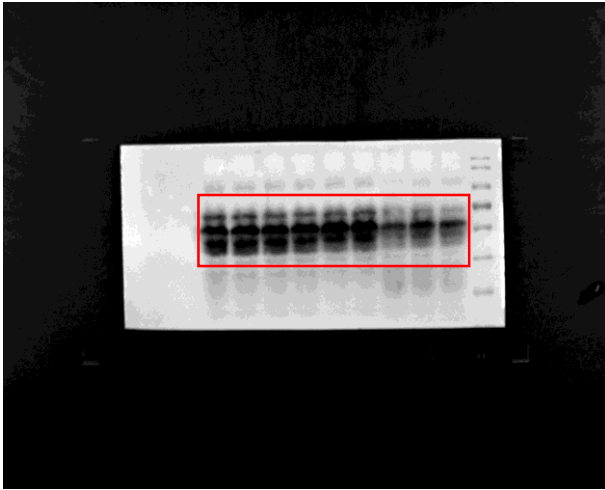

IB: ACTB

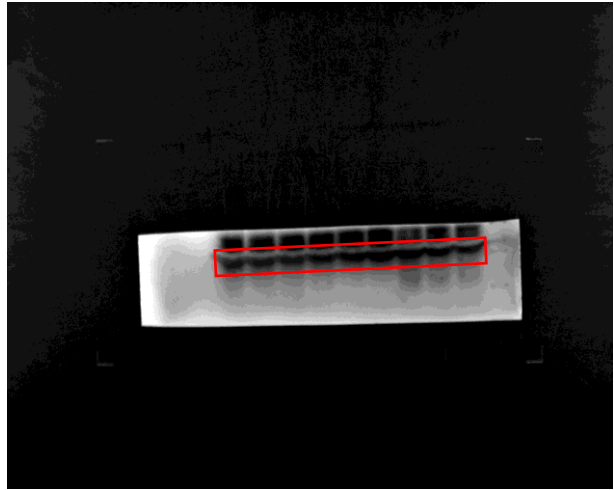

**Fig. S5** Uncropped western blot images for Fig. 2q. Red boxes indicate cropped regions.

Fig. S6

IB: NeuN

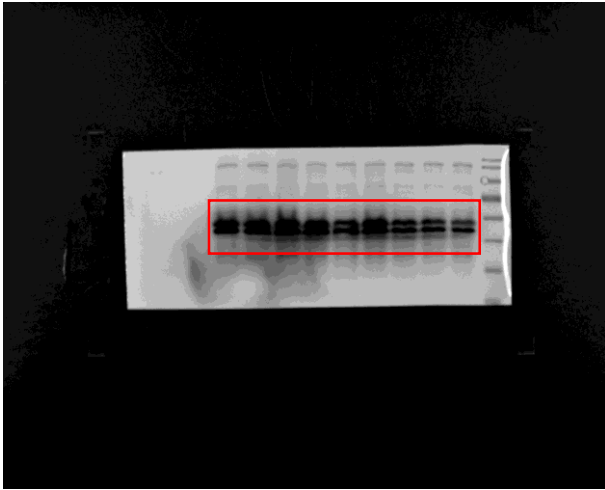

IB: GAPDH

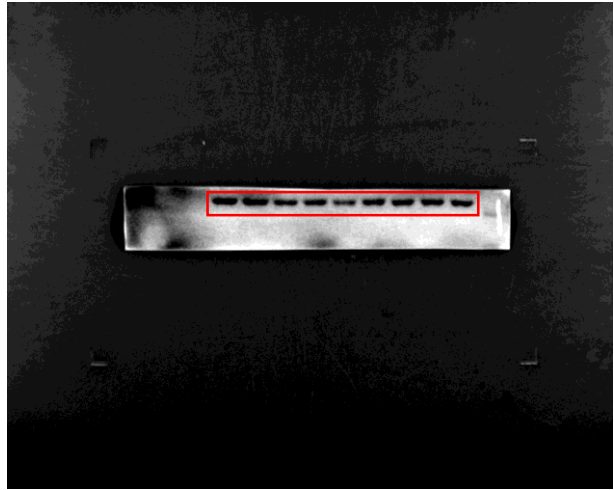

**Fig. S6** Uncropped western blot images for Fig 2r. Red boxes indicate cropped regions.

Fig. S7

IB: Flag

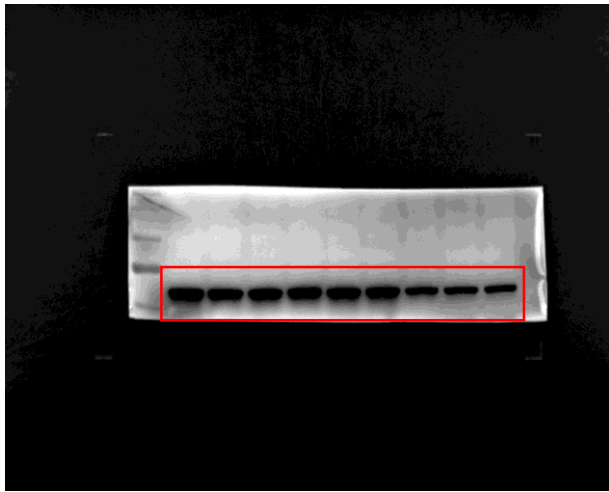

IB: ACTB

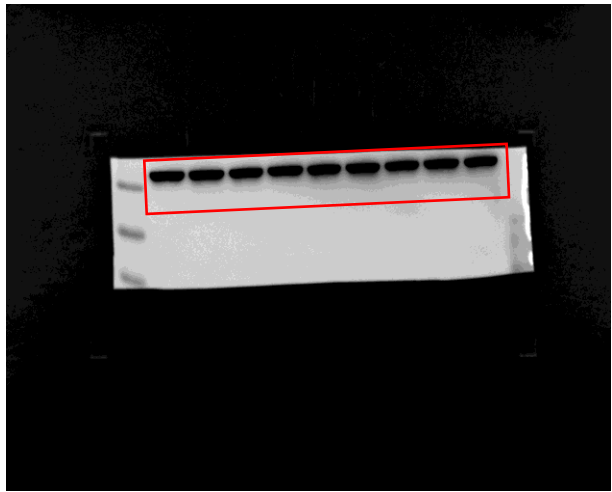

**Fig. S7** Uncropped western blot images for Fig. 3e. Red boxes indicate cropped regions.

Fig. S8

IB: HA (RfxCas13d)

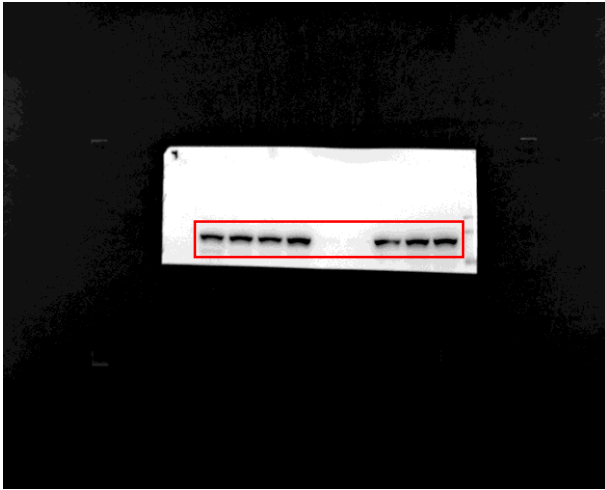

IB: Flag (tdTomato)

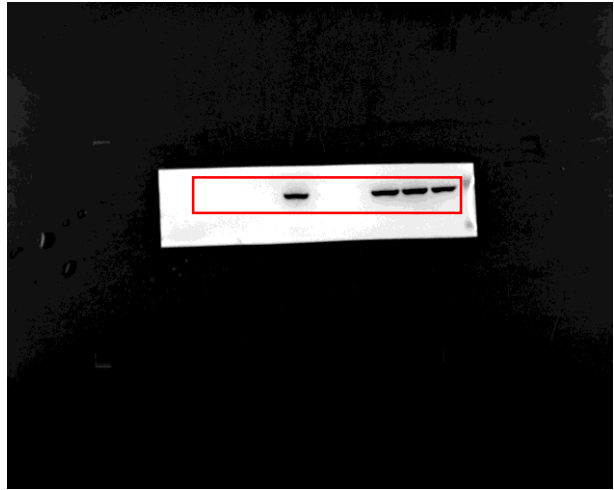

IB: ACTB

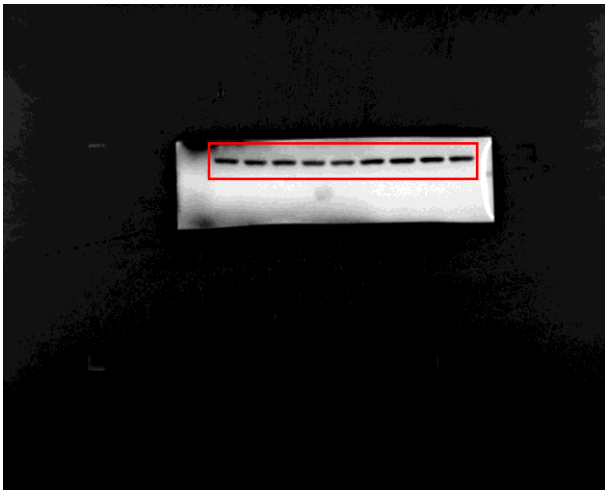

**Fig. S8** Uncropped western blot images for Fig. 4a. Red boxes indicate cropped regions.



Fig. S9

IB: Puromycin

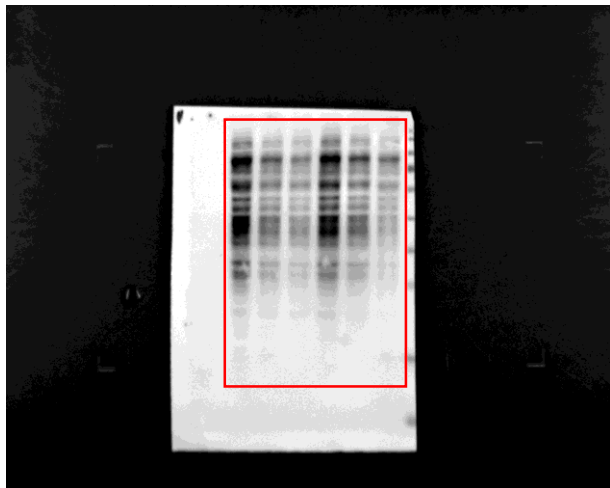

IB: Flag (tdTomato)

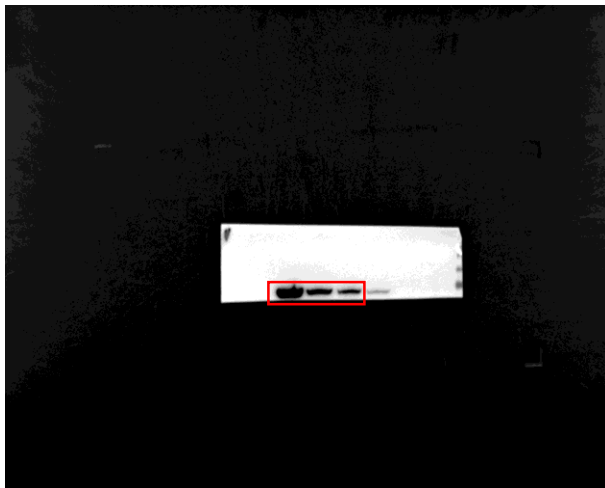

IB: HA (SIK3-S)

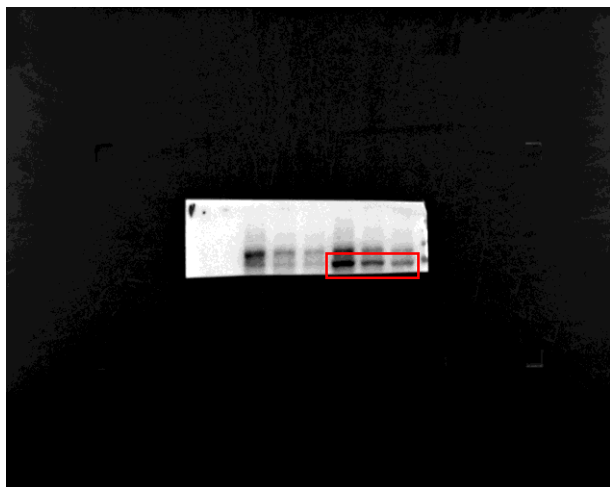

IB: TUBULIN

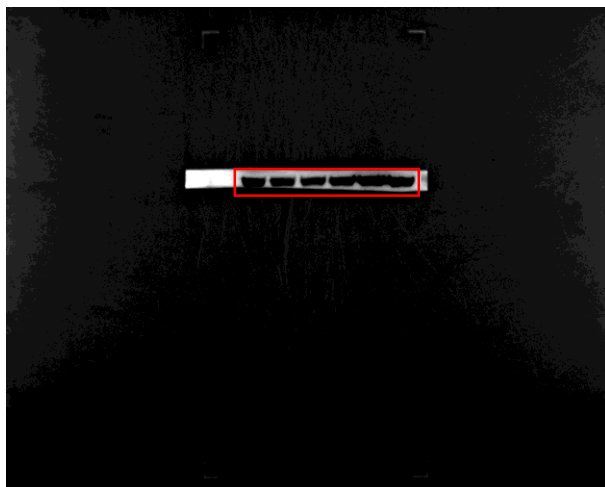

IB: GAPDH

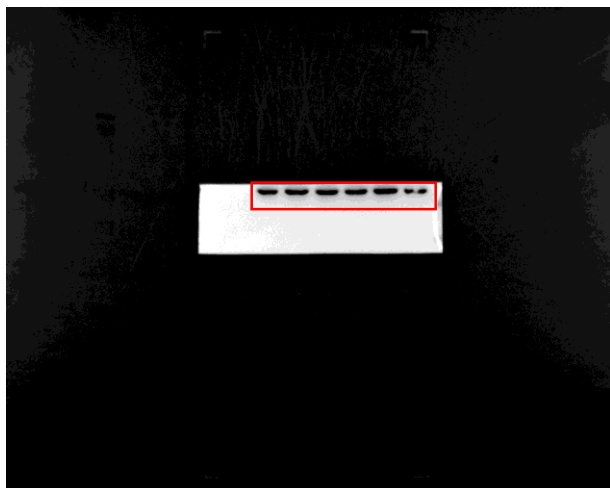

Comassie staining

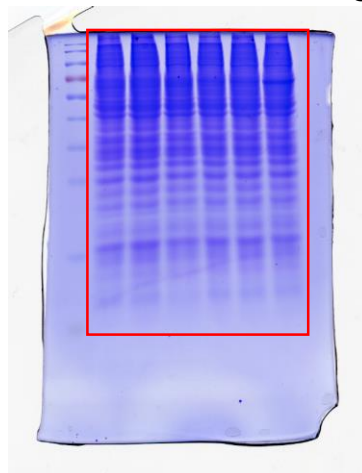

Fig. S9 Uncropped western blot images for Fig. 5c. Red boxes indicate cropped regions.

Fig. S10

IB: p-JNK

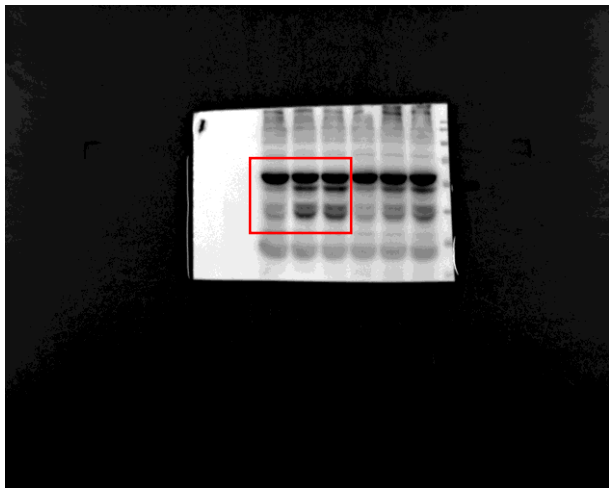

IB: p-p38

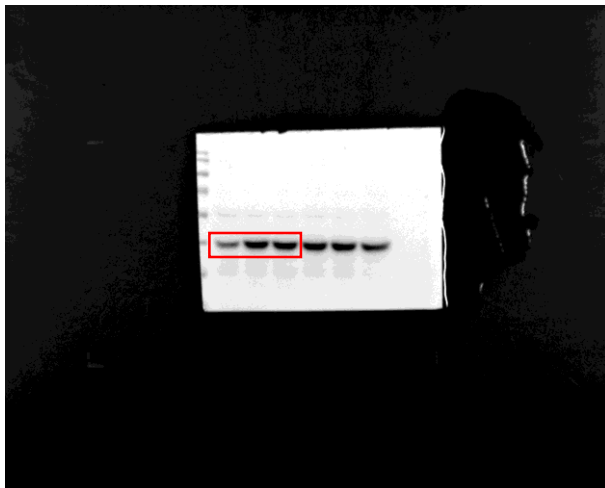

IB: p-ERK1/2

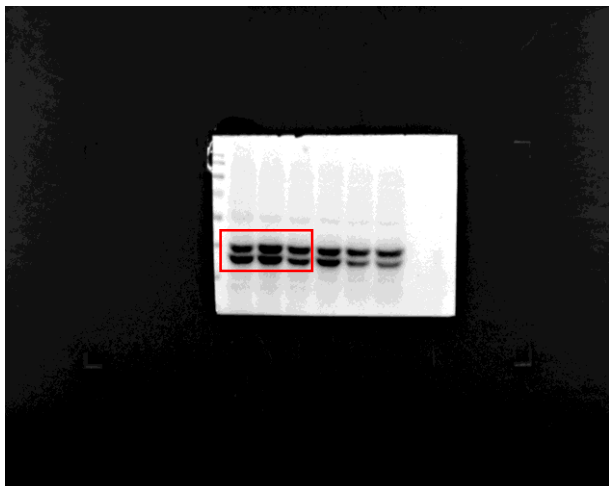

IB: Flag (tdTomato)

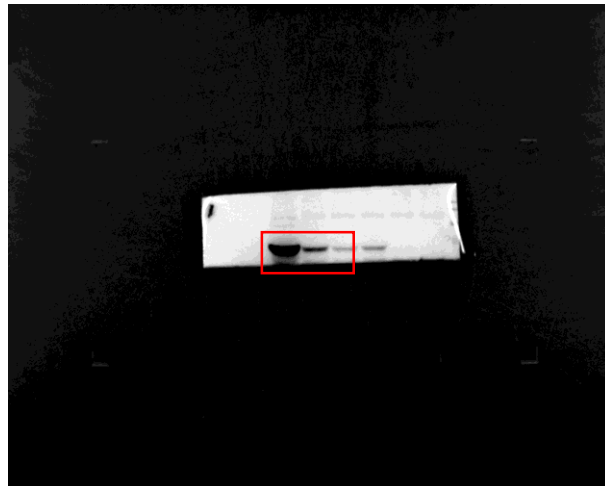

IB: ACTB

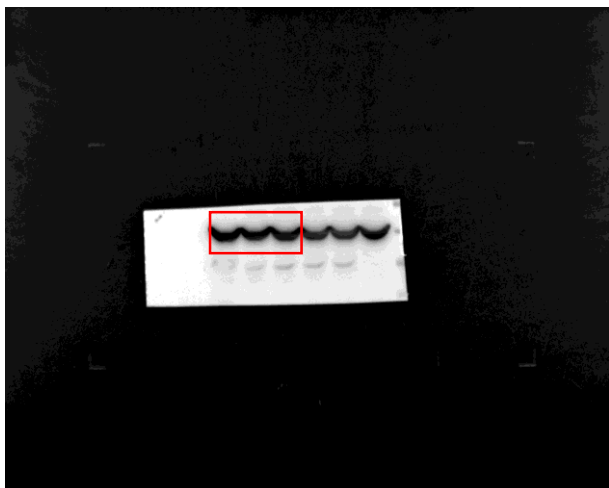

**Fig. S10** Uncropped western blot images for Fig. 5h. Red boxes indicate cropped regions.

Fig. S11

IB: ZAK (ZAK $\alpha$ )

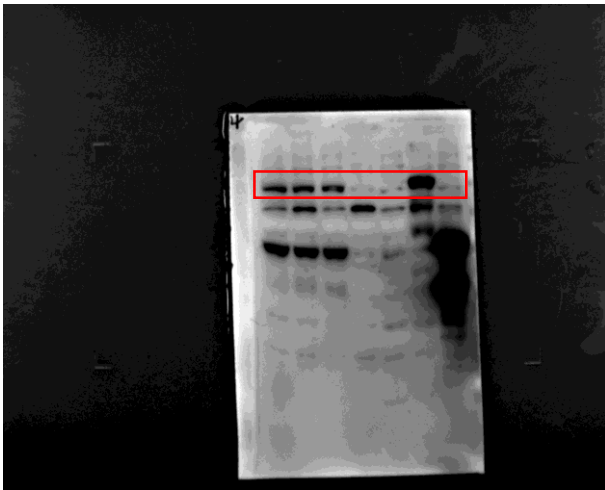

IB: ZAK (ZAK $\beta$ )

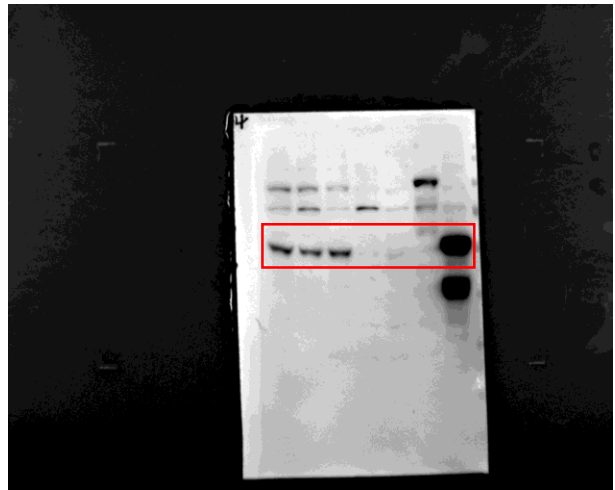

IB: PKR

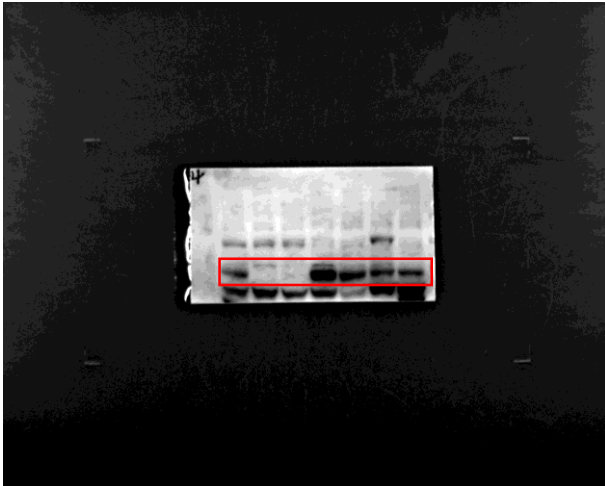

IB: ACTB

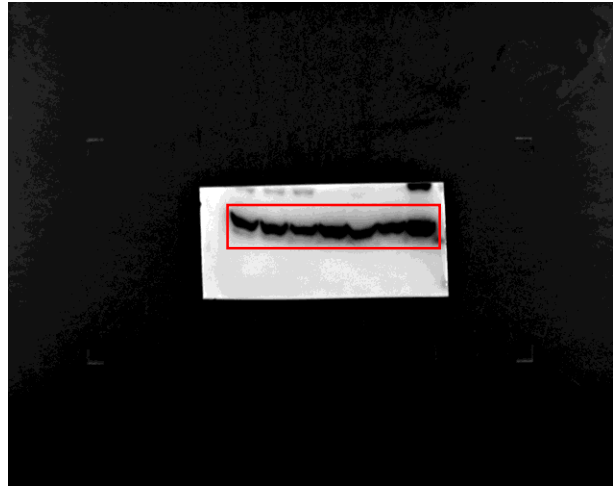

**Fig. S11** Uncropped western blot images for Fig. 5k . Red boxes indicate cropped regions.

Fig. S12

IB: p-JNK

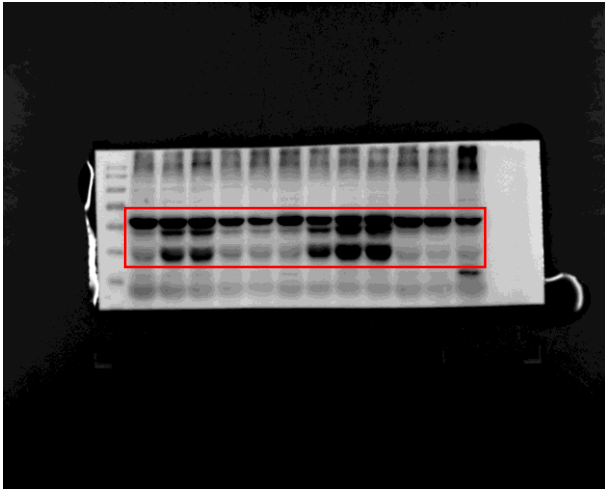

IB: p-p38

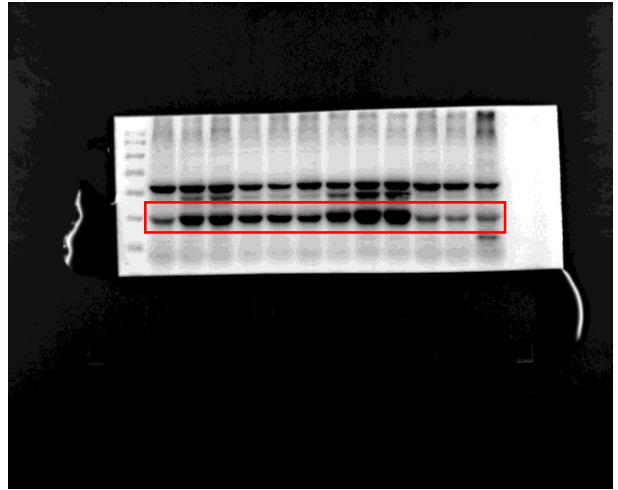

IB: Flag (tdTomato)

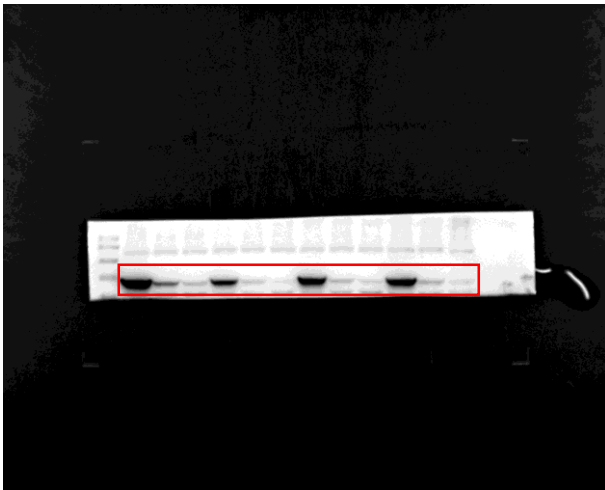

IB: ACTB

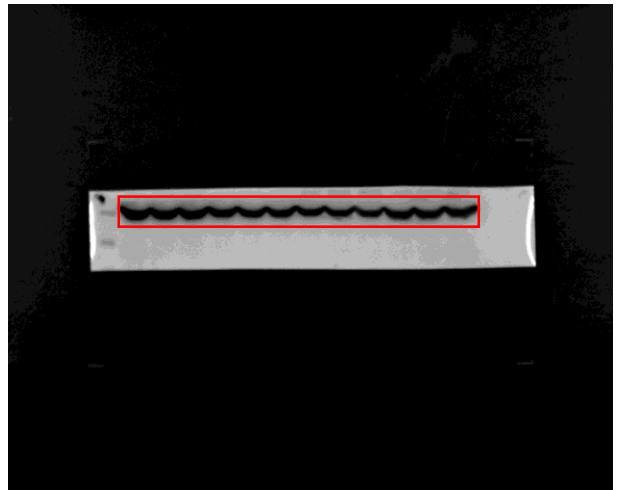

**Fig. S12** Uncropped western blot images for Fig. 5I . Red boxes indicate cropped regions.

Fig. S13

IB: HA (RfxCas13d)

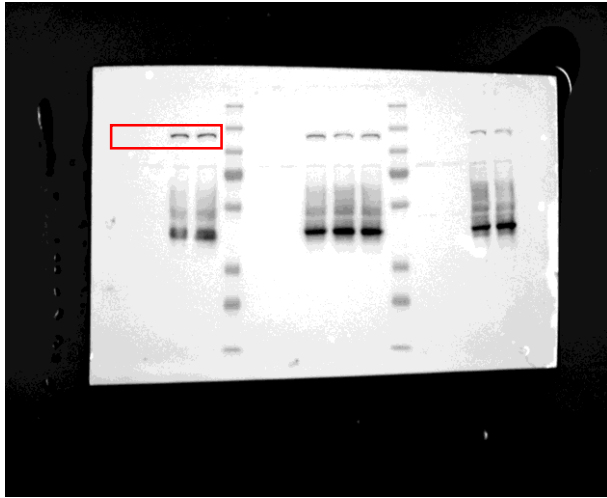

IB: ACTB

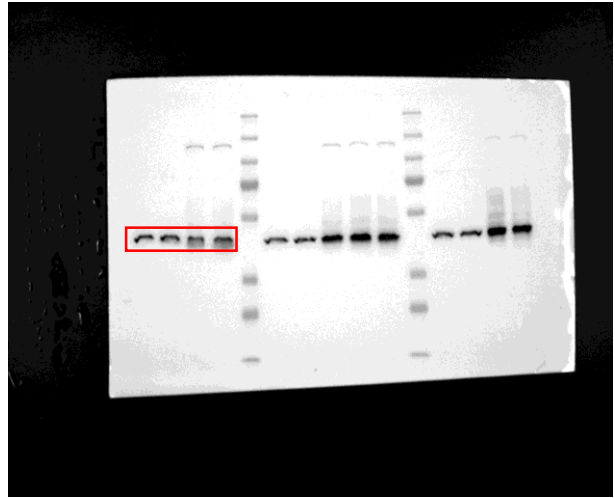

**Fig. S13** Uncropped western blot images for Additional file 1: Fig. S3b. Red boxes indicate cropped regions.

Fig. S14

IB: HA (RfxCas13d)

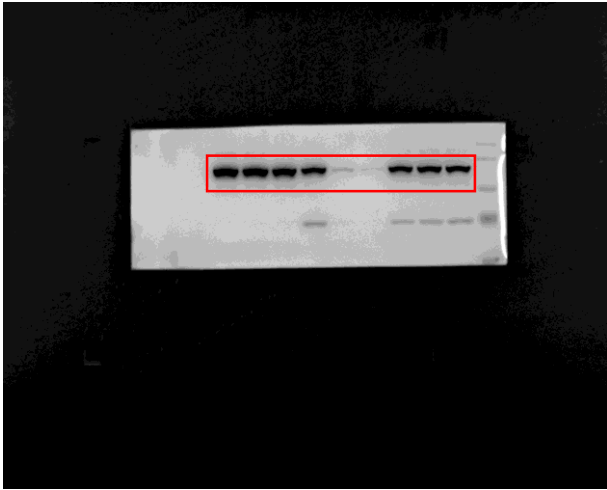

IB: HA (SIK3-S)

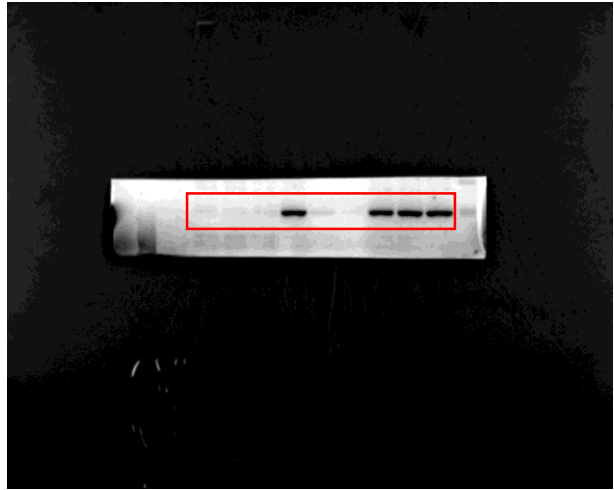

IB: ACTB

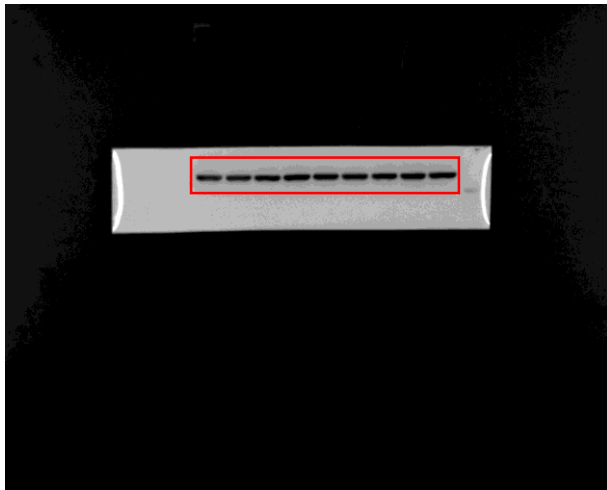

**Fig. S14** Uncropped western blot images for Additional file 1: Fig. S7a. Red boxes indicate cropped regions.

Fig. S15

IB: Puromycin

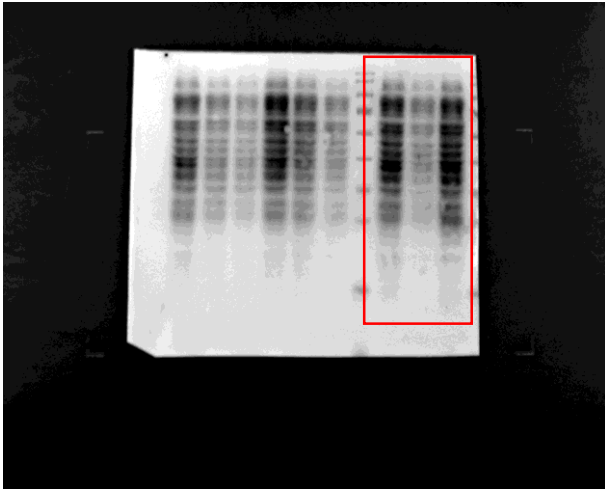

IB: HA (SIK3-S/SIK3-S-K37M)

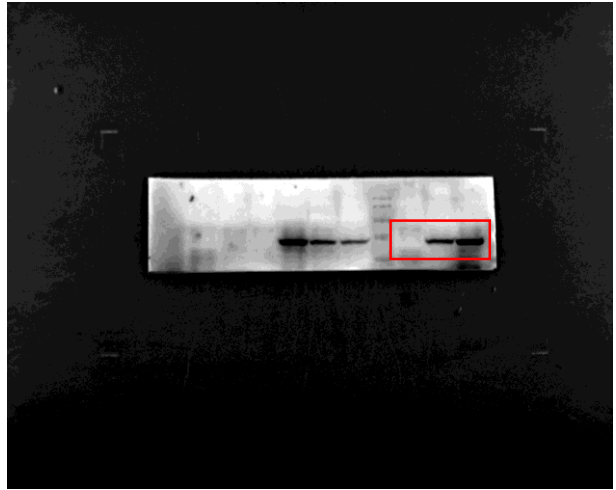

IB: ACTB

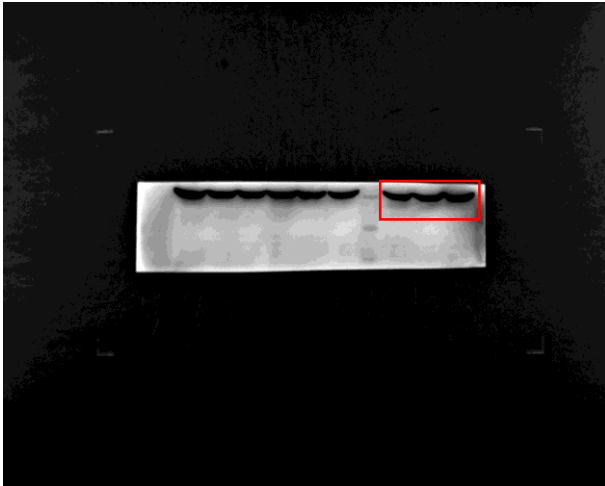

**Fig. S15** Uncropped western blot images for Additional file 1: Fig. S9a. Red boxes indicate cropped regions.

Fig. S16

IB: Puromycin

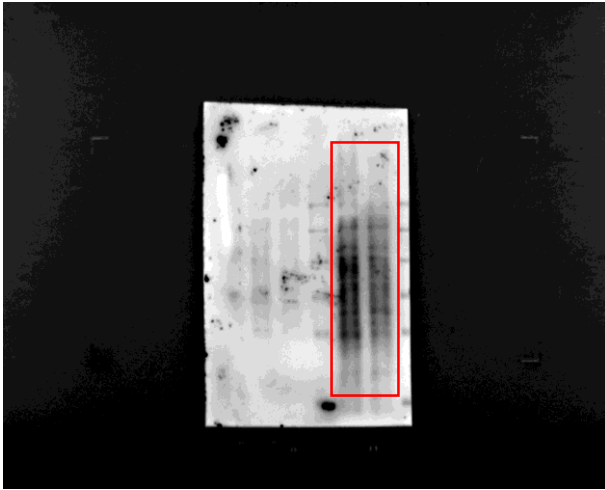

IB: HA (RfxCas13d)

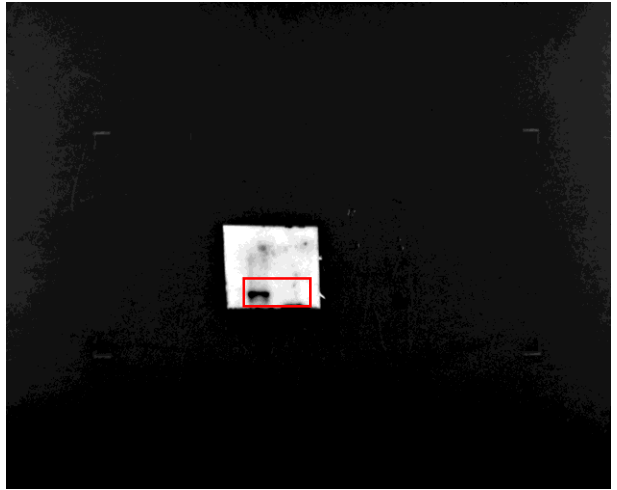

IB: Flag (tdTomato)

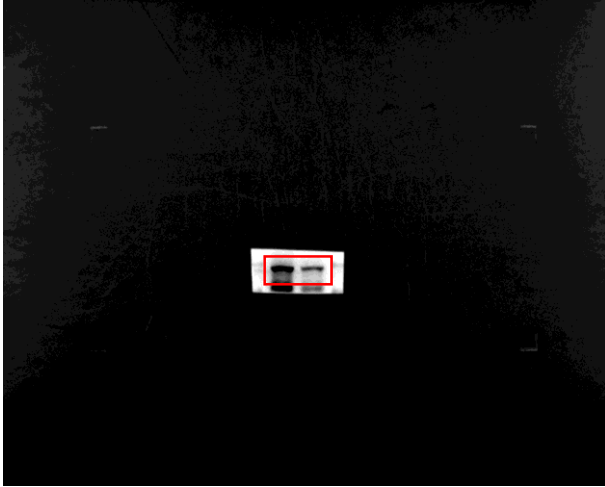

IB: ACTB

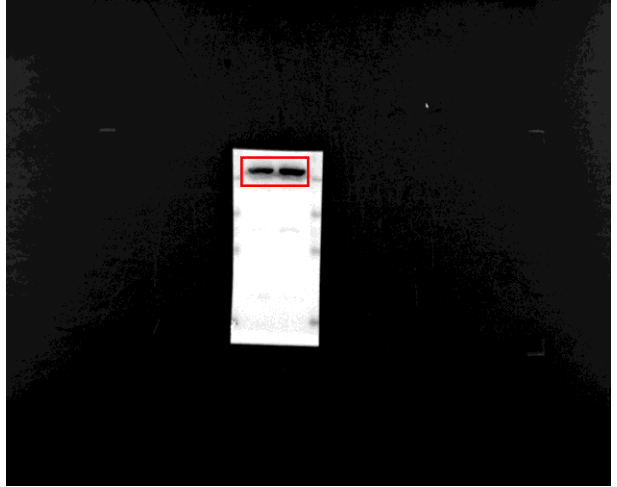

**Fig. S16** Uncropped western blot images for Additional file 1: Fig. S11p. Red boxes indicate cropped regions.



Fig. S17

IB: Puromycin

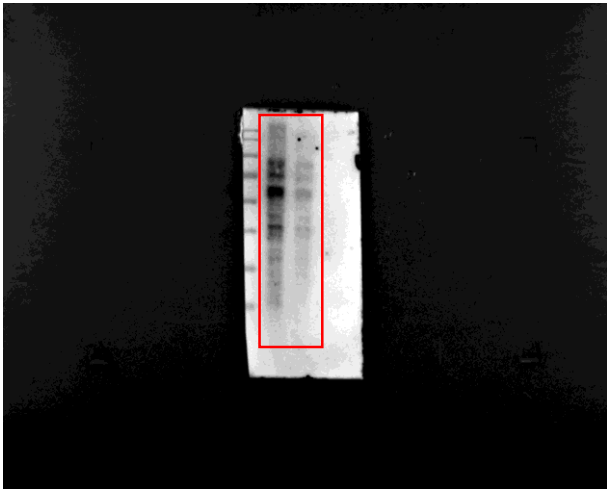

IB: HA (RfxCas13d)

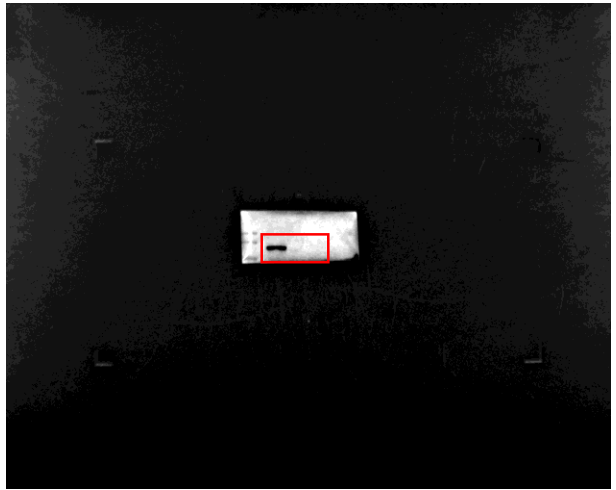

IB: Flag (tdTomato)

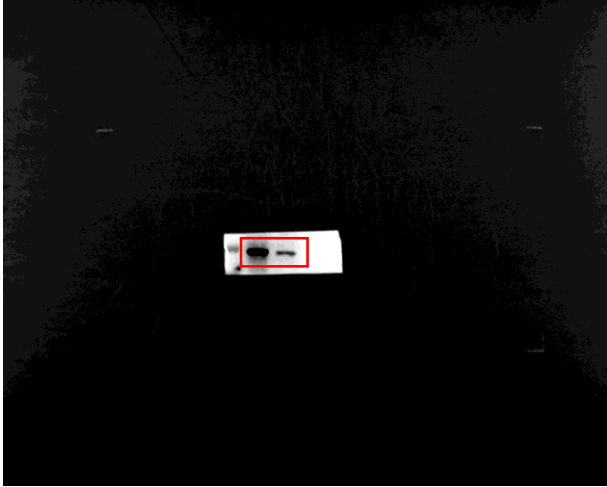

IB: ACTB

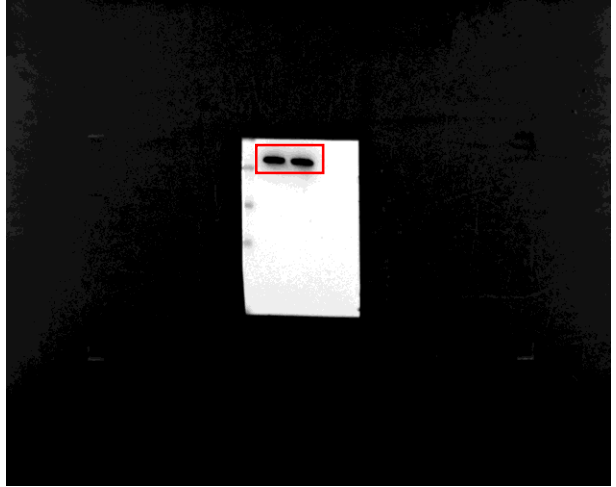

**Fig. S17** Uncropped western blot images for Additional file 1: Fig. S11q. Red boxes indicate cropped regions.

Fig. S18

IB: Puromycin

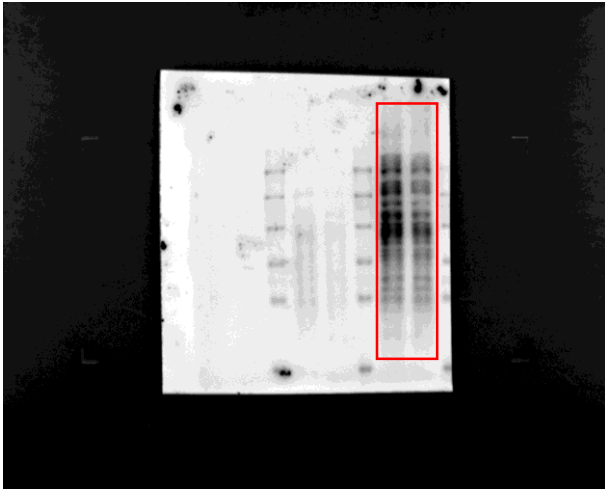

IB: HA (RfxCas13d)

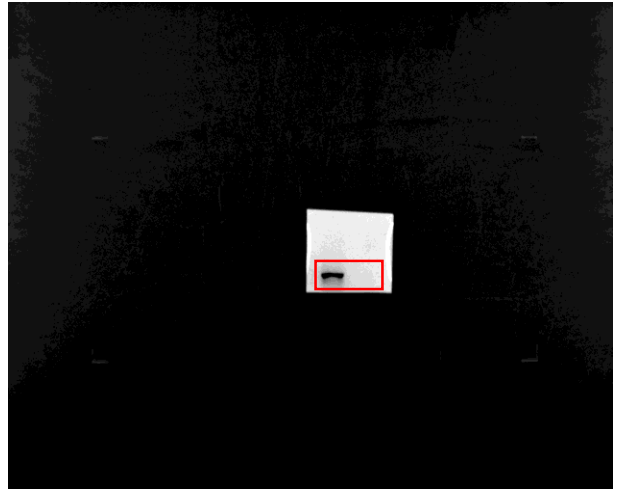

IB: Flag (tdTomato)

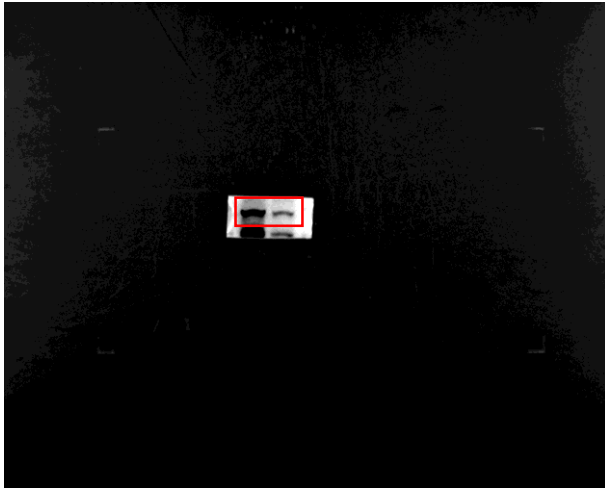

IB: ACTB

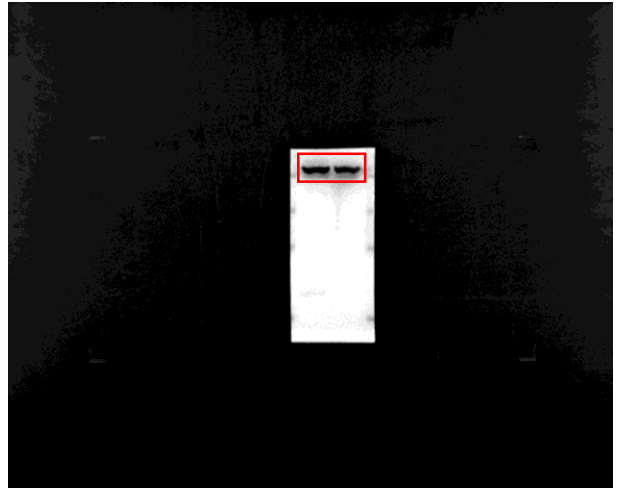

**Fig. S18** Uncropped western blot images for Additional file 1: Fig. S11r. Red boxes indicate cropped regions.

Fig. S19

IB: HA (RfxCas13d)

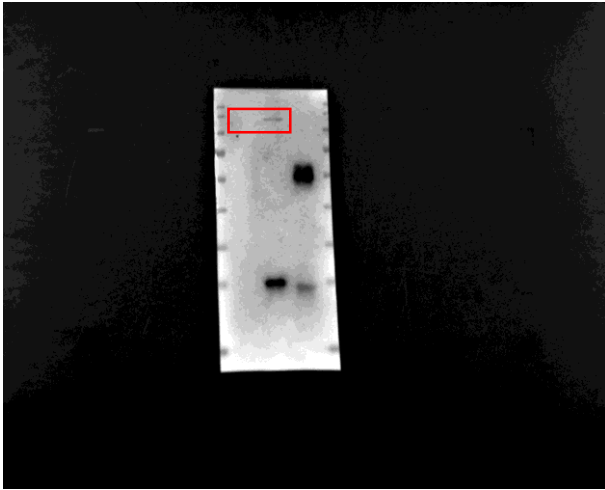

IB: GAPDH

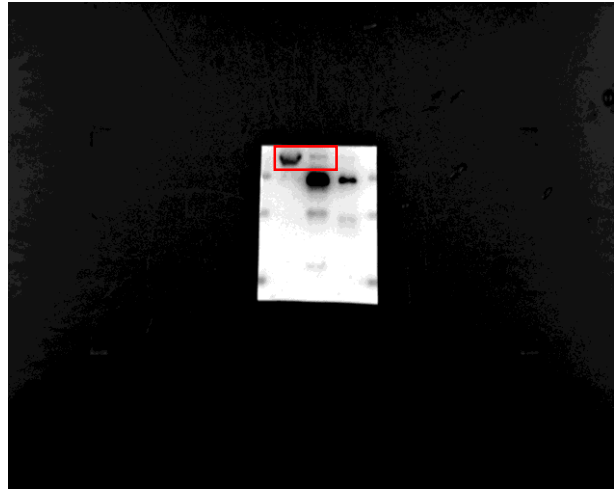

**Fig. S19** Uncropped western blot images for Response Fig. 1a (First revision). Red boxes indicate cropped regions.

Fig. S20

IB: HA (RfxCas13d)

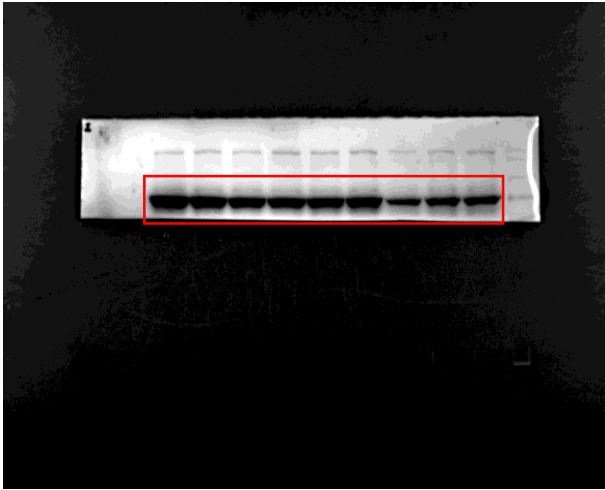

IB: GAPDH

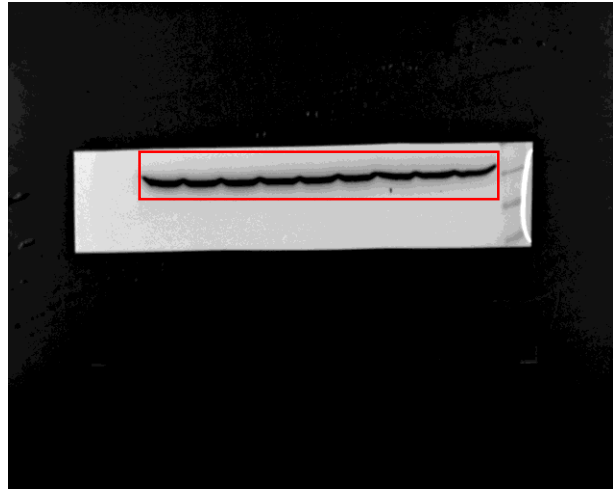

Fig. S20 Uncropped western blot images for Response Fig. 4a (First revision). Red boxes indicate cropped regions.

Fig. S21

IB: HA (RfxCas13d)

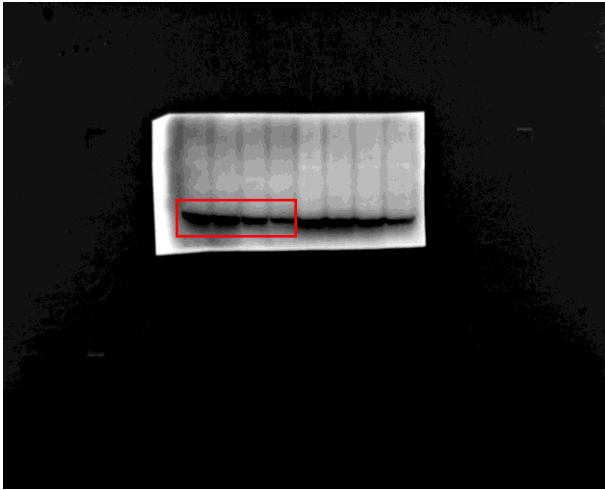

IB: GAPDH

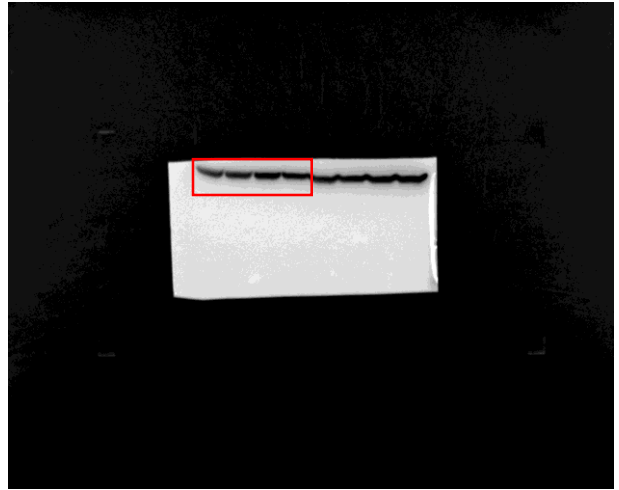

**Fig. S21** Uncropped western blot images for Response Fig. 9a (First revision). Red boxes indicate cropped regions.

Fig. S22

IB: HA (RfxCas13d)

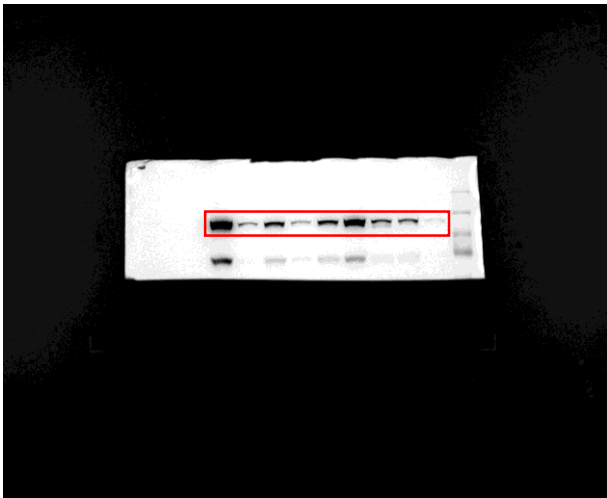

IB: HA (SIK3-S)

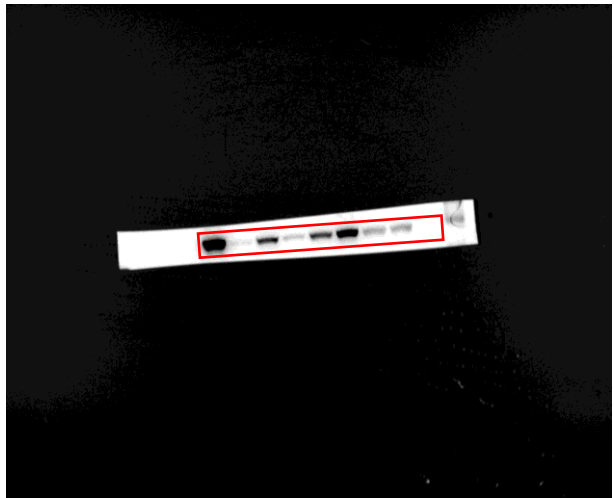

IB: ACTB

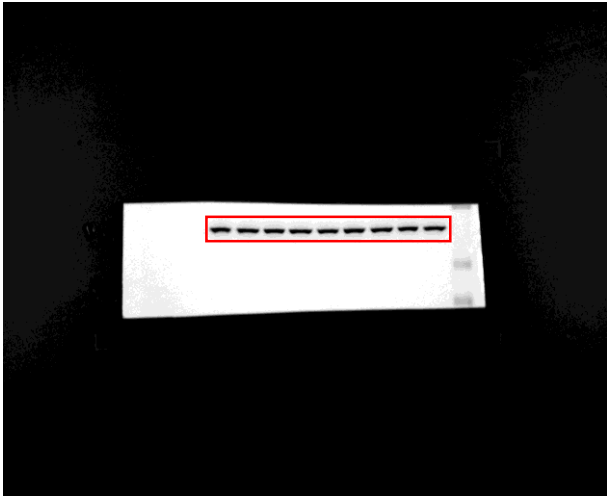

**Fig. S22** Uncropped western blot images for Response Fig. 3b (Second revision). Red boxes indicate cropped regions.

Fig. S23

IB: HA (RfxCas13d)

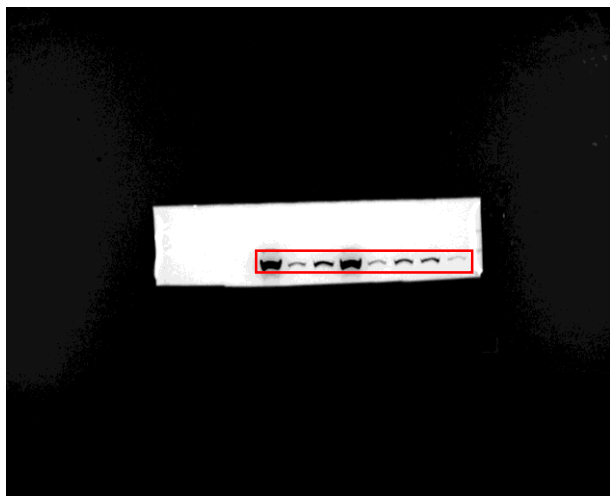

IB: Flag (tdTomato)

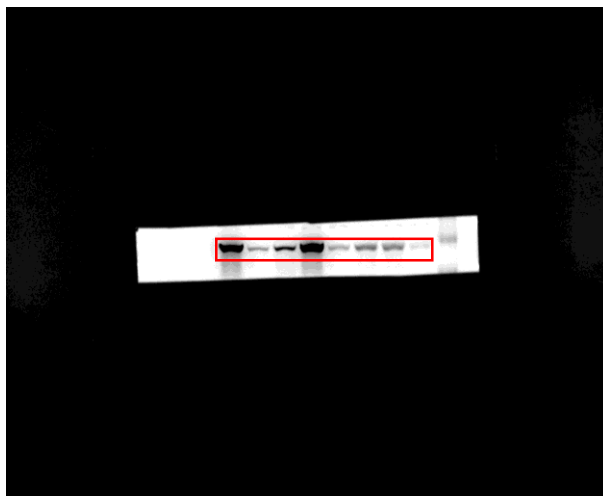

IB: ACTB

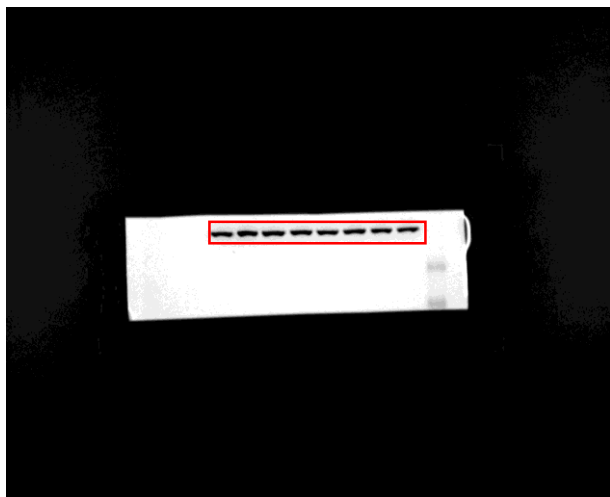

**Fig. S23** Uncropped western blot images for Response Fig. 3c (Second revision). Red boxes indicate cropped regions.
